# Supplementary material for: SGLT-2 inhibitors, GLP-1 receptor agonists, and DPP-4 inhibitors and risk of hyperkalemia among people with type 2 diabetes in clinical practice: population based cohort study
Source: PubMed Central journal article supplement — BMJ. 2024 Jun 26;385:e078483. doi: 10.1136/bmj-2023-078483 (PMC11200155; doi:10.1136/bmj-2023-078483), 2024-06-26
Supplement: fued078483.ww.pdf [file fued078483.ww.pdf]

## Supplemental material

|                                         |                                                                                                                                                                                                                                                                            |
|-----------------------------------------|----------------------------------------------------------------------------------------------------------------------------------------------------------------------------------------------------------------------------------------------------------------------------|
| <a href="#">Supplementary Table 1.</a>  | Definitions of inclusion and exclusion criteria.                                                                                                                                                                                                                           |
| <a href="#">Supplementary Table 2.</a>  | Hyperkalemia outcome definitions.                                                                                                                                                                                                                                          |
| <a href="#">Supplementary Table 3.</a>  | Comparative effectiveness of (A) SGLT-2i versus DPP-4i, (B) GLP-1RA vs. DPP-4i and (C) SGLT-2i vs. GLP-1RA on risk of hyperkalemia diagnosis in inpatient or outpatient setting among subgroups after 1:1 propensity score matching.                                       |
| <a href="#">Supplementary Table 4.</a>  | Full list of baseline characteristics in patients with type 2 diabetes, stratified by GLP-1RA vs. DPP-4i initiation in the pooled cohort, before and after 1:1 propensity score matching.                                                                                  |
| <a href="#">Supplementary Table 5.</a>  | Full list of baseline characteristics in patients with type 2 diabetes, stratified by SGLT-2i vs. GLP-1RA initiation in the pooled cohort, before and after 1:1 propensity score matching.                                                                                 |
| <a href="#">Supplementary Table 6.</a>  | Individual SGLT-2i, GLP-1RA and DPP-4i agents included in the analysis after 1:1 propensity score matching.                                                                                                                                                                |
| <a href="#">Supplementary Table 7.</a>  | Follow-up and censoring reasons after 1:1 propensity score matching for (A) SGLT-2i vs. DPP-4i, (B) GLP-1RA vs. DPP-4i and (C) SGLT-2i vs. GLP-1RA.                                                                                                                        |
| <a href="#">Supplementary Table 8.</a>  | Absolute risks and risk differences for the primary outcome at 6-month intervals for SGLT-2i vs. DPP-4i, GLP-1RA vs. DPP-4i and SGLT-2i vs. GLP-1RA.                                                                                                                       |
| <a href="#">Supplementary Table 9.</a>  | Comparative effectiveness of (A) SGLT-2i versus DPP-4i, (B) GLP-1RA vs. DPP-4i and (C) SGLT-2i vs. GLP-1RA on risk of serum potassium $\geq 5.5$ mmol/L or hyperkalemia diagnosis in inpatient setting (secondary outcome) before and after 1:1 propensity score matching. |
| <a href="#">Supplementary Table 10.</a> | Comparative effectiveness of (A) SGLT-2i versus DPP-4i, (B) GLP-1RA vs. DPP-4i and (C) SGLT-2i vs. GLP-1RA on risk of hyperkalemia diagnosis in inpatient or emergency department setting (secondary outcome) before and after 1:1 propensity score matching.              |
| <a href="#">Supplementary Table 11.</a> | Sensitivity analyses: Incidence rate differences and hazard ratios for (A) SGLT-2i vs. DPP-4i, (B) GLP-1RA vs. DPP-4i and (C) SGLT-2i vs. GLP-1RA after 1:1 propensity score matching.                                                                                     |
| <a href="#">Supplementary Figure 1.</a> | Overview of study design                                                                                                                                                                                                                                                   |

**Supplemental Table 1.** Definitions of inclusion and exclusion criteria.

| Inclusion/exclusion criteria        | Codes                                                                                                                                                                                                                                                                                                                                                                                                                                                                                                                                                                                                                                        | Assessment period | Care Setting                                   | Position |
|-------------------------------------|----------------------------------------------------------------------------------------------------------------------------------------------------------------------------------------------------------------------------------------------------------------------------------------------------------------------------------------------------------------------------------------------------------------------------------------------------------------------------------------------------------------------------------------------------------------------------------------------------------------------------------------------|-------------------|------------------------------------------------|----------|
| Diabetes type 2                     | ICD-9 DX: 250.*0, 250.*2<br>ICD-10 DX: E11.***                                                                                                                                                                                                                                                                                                                                                                                                                                                                                                                                                                                               | [-365, 0]         | Inpatient,<br>Outpatient,<br>Carrier<br>Claims | Any      |
| Diabetes type 1                     | ICD-9 DX: 250.*1, 250.*3<br>ICD-10 DX: E10.***                                                                                                                                                                                                                                                                                                                                                                                                                                                                                                                                                                                               | [-365, 0]         | Inpatient,<br>Outpatient,<br>Carrier<br>Claims | Any      |
| Secondary or gestational diabetes   | ICD-9 DX: 249.**, 648.8*<br>ICD-10 DX: E08.***, E09.***, O24.4*, O99.81*                                                                                                                                                                                                                                                                                                                                                                                                                                                                                                                                                                     | [-365, 0]         | Inpatient,<br>Outpatient,<br>Carrier<br>Claims | Any      |
| End stage kidney disease            | ICD-9 DX: 585.5, 585.6, 996.81, V42.0, V45.1*, V56.**, V56.32<br>ICD-10 DX: N18.5, N18.6, R88.0, T82.41, T82.42, T82.49, T85.611, T85.621, T85.631, T86.1*, Y84.1, Z48.22, Z49.**, Z91.15, Z94.0, Z99.2<br>ICD-9 PX: 39.95, 54.98, 55.6*<br>ICD-10 PX: 0TY00Zx, 0TY10Zx, 3E1M39Z, 5A1Dx0Z<br>CPT-4/HCPCS (Inpatient care setting only): 50360, 50365, 90920, 90921, 90924, 90925, 90935, 90937, 90939, 90940, 90945, 90947, 90957, 90958, 90959, 90960, 90961, 90962, 90965, 90966, 90969, 90970, 90989, 90993, 90999, 90997, 99512, 99559, 99512, G0257, G0314, G0315, G0316, G0317, G0318, G0319, G0322, G0323, G0326, G0327, S9335, S9339 | [-365, 0]         | Inpatient,<br>Outpatient,<br>Carrier<br>Claims | Any      |
| Nursing home admission              | CPT-4/HCPCS: 99301-99303, 99311-99313, 99315, 99316, 99379, 99380<br>Provider category: 0013-0018, 3009<br>Discharge status: 03, 64, 83, 92<br>Facility type code: 2<br>NCH claim type code: 20, 30                                                                                                                                                                                                                                                                                                                                                                                                                                          | [-365, 0]         | Inpatient,<br>Outpatient,<br>Carrier<br>Claims | Any      |
| Pancreatitis                        | ICD 9 DX: 577.0, 577.1<br>ICD 10 DX: K85.*, K86.0, K86.1                                                                                                                                                                                                                                                                                                                                                                                                                                                                                                                                                                                     | [-365, 0]         | Inpatient,<br>Outpatient,<br>Carrier<br>Claims | Any      |
| Cirrhosis                           | ICD-9 DX: 571.2, 571.5, 571.6<br>ICD-10 DX: K70.11, K70.2, K70.3x, K70.4x, K74.*                                                                                                                                                                                                                                                                                                                                                                                                                                                                                                                                                             | [-365, 0]         | Inpatient,<br>Outpatient,<br>Carrier<br>Claims | Any      |
| Acute hepatitis                     | ICD-9 DX: 070.20, 070.21, 070.30, 070.31, 070.41, 070.51, 571.1<br>ICD-10 DX: B16.0, B16.1, B16.2, B16.9, B17.0, B17.10, B17.11, B17.2, B17.8, B17.9, K71.2                                                                                                                                                                                                                                                                                                                                                                                                                                                                                  | [-365, 0]         | Inpatient,<br>Outpatient,<br>Carrier<br>Claims | Any      |
| Multiple endocrine neoplasia type 2 | ICD-9 DX: 258.02, 258.03<br>ICD-10 DX: E31.22, E31.23                                                                                                                                                                                                                                                                                                                                                                                                                                                                                                                                                                                        | [-365, 0]         | Inpatient,<br>Outpatient,<br>Carrier<br>Claims | Any      |
| Organ transplant                    | ICD-9 DX: 996.8*, E878.0, V42.** (except V42.2*-V42.5*), V58.44                                                                                                                                                                                                                                                                                                                                                                                                                                                                                                                                                                              | [-365, 0]         | Inpatient,<br>Outpatient,                      | Any      |

|                   |                                                                                                                                                                                                                                                                                                                                                                                                                                                                                                                                                                                                                                                                                                                                                                                              |          |                                       |                  |
|-------------------|----------------------------------------------------------------------------------------------------------------------------------------------------------------------------------------------------------------------------------------------------------------------------------------------------------------------------------------------------------------------------------------------------------------------------------------------------------------------------------------------------------------------------------------------------------------------------------------------------------------------------------------------------------------------------------------------------------------------------------------------------------------------------------------------|----------|---------------------------------------|------------------|
|                   | <p>ICD-10 DX: T86.*** (except T86.82*, T86.84*), Y83.0, Z48.2*, Z94.** (except Z94.5-Z94.7)</p> <p>ICD-9 PX: 33.5x, 33.6x, 37.51, 41.0x, 46.97, 50.5x, 52.8x, 55.6x</p> <p>ICD-10 PX: 02YA***, 0BYC***, 0DY8***, 0DYE***, 0FSG***, 0FY***, 0TS00ZZ, 0TS10ZZ, 0TY****,</p> <p>30230AZ, 30230G*, 30230X*, 30230Y*, 30233AZ, 30233G*, 30233X*, 30233Y*, 30240AZ, 30240G*, 30240X*, 30240Y*, 30243AZ, 30243G*, 30243X*, 30243Y*, 30250G*, 30250X*, 30250Y*, 30253G*, 30253X*, 30253Y*, 30260G*, 30260X*, 30260Y*, 30263G*, 30263X*, 30263Y*, 3E03005, 3E030U*, 3E03305, 3E033U*, 3E04005, 3E04305, 3E05005, 3E05305, 3E06005, 3E06305, 3E0J3U*, 3E0J7U*, 3E0J8U*</p> <p>CPT-4: 32851-32854, 33935, 33945, 38240, 38241, 44135, 44136, 47135, 47136, 48554, 48556, 50360, 50365, 50370, 50380</p> |          | Carrier Claims OR Prescription Claims |                  |
| Number of SGLT2i  | <p>Excludes anyone taking more than 1 SGLT2i medication:</p> <p>Prescription claims:</p> <p>NDC Generic :</p> <p>EMPAGLIFLOZIN, EMPAGLIFLOZIN/LINAGLIPTIN, EMPAGLIFLOZIN/LINAGLIPTIN/METFORMIN HCL, EMPAGLIFLOZIN/METFORMIN HCL, CANAGLIFLOZIN, CANAGLIFLOZIN/METFORMIN HCL, DAPAGLIFLOZIN PROPANEDIOL, DAPAGLIFLOZIN PROPANEDIOL/METFORMIN HCL, DAPAGLIFLOZIN PROPANEDIOL/SAXAGLIPTIN HCL, ERTUGLIFLOZIN PIDOLATE, ERTUGLIFLOZIN PIDOLATE/METFORMIN HCL, ERTUGLIFLOZIN PIDOLATE/SITAGLIPTIN PHOSPHATE</p>                                                                                                                                                                                                                                                                                   | [0, 0]   | Prescription Claims                   | Generic          |
| Number of GLP-1RA | <p>Excludes anyone taking more than 1 GLP-1RA medication:</p> <p>Prescription claims:</p> <p>NDC Generic : ALBIGLUTIDE, DULAGLUTIDE, EXENATIDE, EXENATIDE MICROSPHERES, LIRAGLUTIDE, INSULIN DEGLUDEC/LIRAGLUTIDE, LIXISENATIDE, INSULIN GLARGINE, HUMAN RECOMBINANT ANALOG/LIXISENATIDE, SEMAGLUTIDE</p>                                                                                                                                                                                                                                                                                                                                                                                                                                                                                    | [0, 0]   | Prescription Claims                   | Generic          |
| Number of DPP-4i  | <p>Excludes anyone taking more than 1 DPP4i medication:</p> <p>Prescription claims:</p> <p>NDC Generic: ALOGLIPTIN BENZOATE, ALOGLIPTIN BENZOATE/METFORMIN HCL, ALOGLIPTIN BENZOATE/PIOGLITAZONE HCL, EMPAGLIFLOZIN/LINAGLIPTIN, EMPAGLIFLOZIN/LINAGLIPTIN/METFORMIN HCL, LINAGLIPTIN, LINAGLIPTIN/METFORMIN HCL, DAPAGLIFLOZIN PROPANEDIOL/SAXAGLIPTIN HCL, SAXAGLIPTIN HCL, SAXAGLIPTIN HCL/METFORMIN HCL, ERTUGLIFLOZIN PIDOLATE/SITAGLIPTIN PHOSPHATE, SITAGLIPTIN PHOSPHATE, SITAGLIPTIN PHOSPHATE/METFORMIN HCL, SITAGLIPTIN PHOSPHATE/SIMVASTATIN</p> <p>BRAND : SAXENDA</p>                                                                                                                                                                                                          | [0, 0]   | Prescription Claims                   | Generic or Brand |
| Hyperkalemia      | <p>ICD-9 DX: 276.7</p> <p>ICD-10 DX: E87.5</p>                                                                                                                                                                                                                                                                                                                                                                                                                                                                                                                                                                                                                                                                                                                                               | [-90, 0] | Inpatient, Outpatient,                | Any              |

|                   |                                                                                                                                                               |          |                     |         |
|-------------------|---------------------------------------------------------------------------------------------------------------------------------------------------------------|----------|---------------------|---------|
|                   |                                                                                                                                                               |          | Carrier Claims      |         |
| Potassium binders | Prescription Claims: SODIUM ZIRCONIUM CYCLOSILICATE, SODIUM POLYSTYRENE SULFONATE/SORBITOL SOLUTION, PATIROMER CALCIUM SORBITEX, SODIUM POLYSTYRENE SULFONATE | [-90, 0] | Prescription Claims | Generic |

**Supplemental Table 2.** Hyperkalemia outcome definitions.

| Outcome                                                                                                                             | Codes                                                                                                                                                                                                | Care Setting                                     | Position        |
|-------------------------------------------------------------------------------------------------------------------------------------|------------------------------------------------------------------------------------------------------------------------------------------------------------------------------------------------------|--------------------------------------------------|-----------------|
| Primary outcome:<br>Hyperkalemia in inpatient or outpatient setting                                                                 | ICD-9 DX: 276.7<br>ICD-10 DX: E87.5                                                                                                                                                                  | Inpatient,<br>Outpatient,<br>Carrier Claims      | Any             |
| Secondary outcome: Serum potassium $\geq$ 5.5 mmol/L                                                                                | LOINC Codes: 2823-3, 32713-0, 39789-3, 6298-4, 77142-8, 12812-4, 12813-2, 42569-4<br>Potassium lab result number is greater than or equal to 5.5                                                     | Inpatient, Lab results                           | Any             |
| Secondary outcome:<br>Hyperkalemia in inpatient or ED setting                                                                       | ICD-9 DX: 276.7<br>ICD-10 DX: E87.5<br>Type of Service: FAC_OP.ER, PROF.ER AND ICD-9 DX: 276.7<br>Type of Service: FAC_OP.ER, PROF.ER AND ICD-10 DX: E87.5                                           | Inpatient,<br>Emergency                          | Any             |
| Sensitivity analysis outcome:<br>Hyperkalemia in inpatient or outpatient setting or initiation of potassium binder during follow-up | ICD-9 DX: 276.7<br>ICD-10 DX: E87.5<br>Prescription Claims: SODIUM ZIRCONIUM CYCLOSILICATE, SODIUM POLYSTYRENE SULFONATE/SORBITOL SOLUTION, PATIROMER CALCIUM SORBITEX, SODIUM POLYSTYRENE SULFONATE | Inpatient,<br>Outpatient,<br>Prescription Claims | Any,<br>Generic |

**Supplemental Table 3.** Full list of baseline characteristics in patients with type 2 diabetes, stratified by SGLT-2i vs. DPP-4i initiation in the pooled cohort, before and after 1:1 propensity score matching.

| Covariates                               | Before matching    |                     |          | After propensity score matching |                     |          |
|------------------------------------------|--------------------|---------------------|----------|---------------------------------|---------------------|----------|
|                                          | Exposure - SGLT-2i | Comparator - DPP-4i | St. Diff | Exposure - SGLT2i               | Comparator - DPP-4i | St. Diff |
| Number of patients                       | 531,329            | 963,270             |          | 389,454                         | 389,454             |          |
| <b>Demographics</b>                      |                    |                     |          |                                 |                     |          |
| Age; mean (sd)                           | 61.5 (9.6)         | 67.8 (9.7)          | 0.66     | 62.7 (9.5)                      | 62.6 (9.5)          | -0.01    |
| Male; n (%)                              | 292,560 (55.1%)    | 470,713 (48.9%)     | -0.12    | 209,774 (53.9%)                 | 209,725 (53.9%)     | 0.00     |
| Female; n (%)                            | 238,771 (44.9%)    | 492,562 (51.1%)     | 0.12     | 179,682 (46.1%)                 | 179,732 (46.1%)     | 0.00     |
| Race/ethnicity <sup>1</sup> ; n (%)      |                    |                     |          |                                 |                     |          |
| White                                    | 235,123 (70.4%)    | 492,253 (69.8%)     | 0.14     | 174,543 (70.6%)                 | 174,447 (70.6%)     | 0.00     |
| Black                                    | 35,861 (10.7%)     | 83,855 (11.9%)      | 0.08     | 26,576 (10.8%)                  | 26,595 (10.8%)      | 0.00     |
| Asian                                    | 12,392 (3.7%)      | 36,314 (5.2%)       | 0.09     | 10,047 (4.1%)                   | 10,077 (4.1%)       | 0.00     |
| Hispanic                                 | 34,351 (10.3%)     | 60,465 (8.6%)       | -0.01    | 24,361 (9.9%)                   | 24,491 (9.9%)       | 0.00     |
| Other                                    | 16,416 (4.9%)      | 32,203 (4.6%)       | 0.01     | 11,830 (4.8%)                   | 11,747 (4.8%)       | 0.00     |
| Calendar time; n (%)                     |                    |                     |          |                                 |                     |          |
| 2013                                     | 12,478 (2.3%)      | 125,088 (13.0%)     | 0.41     | 11,691 (3.0%)                   | 9,589 (2.5%)        | -0.03    |
| 2014                                     | 53,364 (10.0%)     | 170,402 (17.7%)     | 0.22     | 44,538 (11.4%)                  | 42,960 (11.0%)      | -0.01    |
| 2015                                     | 68,462 (12.9%)     | 150,047 (15.6%)     | 0.08     | 56,740 (14.6%)                  | 57,589 (14.8%)      | 0.01     |
| 2016                                     | 58,167 (10.9%)     | 131,592 (13.7%)     | 0.09     | 49,706 (12.8%)                  | 50,532 (13.0%)      | 0.01     |
| 2017                                     | 65,264 (12.3%)     | 120,979 (12.6%)     | 0.01     | 54,215 (13.9%)                  | 55,559 (14.3%)      | 0.01     |
| 2018                                     | 64,156 (12.1%)     | 106,800 (11.1%)     | -0.03    | 51,916 (13.3%)                  | 52,971 (13.6%)      | 0.01     |
| 2019                                     | 94,140 (17.7%)     | 97,874 (10.2%)      | -0.22    | 66,094 (17.0%)                  | 66,707 (17.1%)      | 0.00     |
| 2020                                     | 57,600 (10.8%)     | 36,116 (3.7%)       | -0.28    | 31,224 (8.0%)                   | 31,114 (8.0%)       | 0.00     |
| 2021                                     | 43,723 (8.2%)      | 19,840 (2.1%)       | -0.28    | 18,642 (4.8%)                   | 18,070 (4.6%)       | -0.01    |
| 2022                                     | 13,975 (2.6%)      | 4,532 (0.5%)        | -0.17    | 4,688 (1.2%)                    | 4,363 (1.1%)        | -0.01    |
| Region <sup>*</sup> ; n (%)              |                    |                     |          |                                 |                     |          |
| Northeast                                | 72,532 (13.7%)     | 166,854 (17.3%)     | 0.10     | 56,611 (14.5%)                  | 56,239 (14.4%)      | 0.00     |
| South                                    | 268,556 (50.5%)    | 435,985 (45.3%)     | -0.10    | 193,347 (49.6%)                 | 193,899 (49.8%)     | 0.00     |
| Midwest                                  | 106,925 (20.1%)    | 197,489 (20.5%)     | 0.01     | 77,908 (20.0%)                  | 77,859 (20.0%)      | 0.00     |
| West                                     | 83,316 (15.7%)     | 162,942 (16.9%)     | 0.03     | 61,588 (15.8%)                  | 61,457 (15.8%)      | 0.00     |
| Medicare Advantage; n (%)                | 3,103 (0.6%)       | 4,685 (0.5%)        | -0.01    | 2,230 (0.6%)                    | 2,184 (0.6%)        | 0.00     |
| Combined comorbidity score; mean (sd)‡   | 1.2 (1.9)          | 1.5 (2.3)           | 0.14     | 1.1 (2.0)                       | 1.1 (1.9)           | -0.01    |
| Frailty score; mean (sd)†                | 0.15 (0.04)        | 0.18 (0.05)         | 0.66     | 0.16 (0.05)                     | 0.16 (0.05)         | 0.00     |
| Frailty score squared; mean (sd)†        | 0.03 (0.02)        | 0.03 (0.03)         | 0.00     | 0.03 (0.02)                     | 0.03 (0.02)         | 0.00     |
| Frailty score categories; n (%)          |                    |                     |          |                                 |                     |          |
| 0.00 - 0.14                              | 284,246 (53.5%)    | 394,060 (40.9%)     | -0.25    | 203,850 (52.3%)                 | 204,567 (52.5%)     | 0.00     |
| 0.15 - 0.24                              | 221,777 (41.7%)    | 466,706 (48.5%)     | 0.14     | 164,964 (42.4%)                 | 164,292 (42.2%)     | 0.00     |
| >= 0.25                                  | 25,306 (4.8%)      | 102,504 (10.6%)     | 0.22     | 20,640 (5.3%)                   | 20,595 (5.3%)       | 0.00     |
| <b>Lifestyle factors; n (%)</b>          |                    |                     |          |                                 |                     |          |
| Overweight                               | 42,653 (8.0%)      | 71,081 (7.4%)       | -0.02    | 31,327 (8.0%)                   | 31,780 (8.2%)       | 0.01     |
| Obesity                                  | 207,419 (39.0%)    | 259,141 (26.9%)     | -0.26    | 135,814 (34.9%)                 | 135,810 (34.9%)     | 0.00     |
| Obese (BMI 30-35 kg/m <sup>2</sup> )     | 82,382 (15.5%)     | 103,609 (10.8%)     | -0.14    | 54,258 (13.9%)                  | 55,809 (14.3%)      | 0.01     |
| Severe obese (BMI>35 kg/m <sup>2</sup> ) | 84,583 (15.9%)     | 89,176 (9.3%)       | -0.20    | 52,073 (13.4%)                  | 50,258 (12.9%)      | -0.01    |
| Smoking                                  | 93,394 (17.6%)     | 169,654 (17.6%)     | 0.00     | 67,228 (17.3%)                  | 67,405 (17.3%)      | 0.00     |

|                                                                    |                 |                 |       |                 |                 |       |
|--------------------------------------------------------------------|-----------------|-----------------|-------|-----------------|-----------------|-------|
| Alcohol abuse or dependence                                        | 5,240 (1.0%)    | 10,118 (1.1%)   | 0.01  | 3,890 (1.0%)    | 3,837 (1.0%)    | 0.00  |
| Drug abuse or dependence                                           | 8,819 (1.7%)    | 14,972 (1.6%)   | -0.01 | 6,207 (1.6%)    | 6,243 (1.6%)    | 0.00  |
| <b>Diabetes-related conditions; n (%)</b>                          |                 |                 |       |                 |                 |       |
| Diabetic nephropathy                                               | 65,906 (12.4%)  | 133,403 (13.8%) | 0.04  | 44,852 (11.5%)  | 44,602 (11.5%)  | 0.00  |
| Diabetic retinopathy                                               | 51,245 (9.6%)   | 92,084 (9.6%)   | 0.00  | 34,775 (8.9%)   | 34,610 (8.9%)   | 0.00  |
| Diabetes with other ophthalmic manifestations                      | 36,049 (6.8%)   | 97,893 (10.2%)  | 0.12  | 27,771 (7.1%)   | 27,676 (7.1%)   | 0.00  |
| Diabetic neuropathy                                                | 106,722 (20.1%) | 189,647 (19.7%) | -0.01 | 73,165 (18.8%)  | 72,803 (18.7%)  | 0.00  |
| Diabetes with peripheral circulatory disorders                     | 6,448 (1.2%)    | 31,920 (3.3%)   | 0.14  | 5,554 (1.4%)    | 5,366 (1.4%)    | 0.00  |
| Diabetic foot                                                      | 11,295 (2.1%)   | 24,161 (2.5%)   | 0.03  | 7,916 (2.0%)    | 7,880 (2.0%)    | 0.00  |
| Infection of lower extremities (cellulitis or osteomyelitis)       | 21,083 (4.0%)   | 45,965 (4.8%)   | 0.04  | 15,318 (3.9%)   | 15,281 (3.9%)   | 0.00  |
| Lower-limb amputations                                             | 2,335 (0.4%)    | 4,489 (0.5%)    | 0.01  | 1,551 (0.4%)    | 1,549 (0.4%)    | 0.00  |
| Erectile Dysfunction                                               | 26,917 (5.1%)   | 37,941 (3.9%)   | -0.06 | 18,261 (4.7%)   | 18,340 (4.7%)   | 0.00  |
| Hypoglycemia                                                       | 58,654 (11.0%)  | 85,057 (8.8%)   | -0.07 | 37,841 (9.7%)   | 37,954 (9.7%)   | 0.00  |
| Hyperglycemia                                                      | 219,115 (41.2%) | 280,011 (29.1%) | -0.26 | 145,183 (37.3%) | 146,046 (37.5%) | 0.00  |
| Diabetic ketoacidosis                                              | 1,264 (0.2%)    | 3,055 (0.3%)    | 0.02  | 899 (0.2%)      | 895 (0.2%)      | 0.00  |
| Hyperosmolar hyperglycemic nonketotic syndrome                     | 4,072 (0.8%)    | 6,978 (0.7%)    | -0.01 | 2,894 (0.7%)    | 2,871 (0.7%)    | 0.00  |
| Diabetes with other complications                                  | 46,784 (8.8%)   | 71,311 (7.4%)   | -0.05 | 31,842 (8.2%)   | 31,735 (8.1%)   | 0.00  |
| Diabetes mellitus without mention of complications                 | 475,125 (89.4%) | 903,441 (93.8%) | 0.16  | 353,305 (90.7%) | 353,417 (90.7%) | 0.00  |
| <b>Diabetes treatment; n (%)</b>                                   |                 |                 |       |                 |                 |       |
| Number of anti-DM medications on day of entry to cohort; mean (sd) | 2.30 (0.89)     | 2.13 (0.77)     | -0.20 | 2.20 (0.83)     | 2.20 (0.78)     | 0.00  |
| Diabetes drugs on day of cohort entry                              |                 |                 |       |                 |                 |       |
| Metformin                                                          | 426,098 (80.2%) | 742,386 (77.1%) | -0.08 | 315,259 (80.9%) | 316,007 (81.1%) | 0.01  |
| Sulfonylureas                                                      | 192,846 (36.3%) | 409,922 (42.6%) | 0.13  | 148,938 (38.2%) | 149,790 (38.5%) | 0.01  |
| Thiazolidinediones                                                 | 47,747 (9.0%)   | 75,541 (7.8%)   | -0.04 | 32,876 (8.4%)   | 32,698 (8.4%)   | 0.00  |
| GLP-1RA                                                            | 118,262 (22.3%) | 39,930 (4.1%)   | -0.56 | 38,561 (9.9%)   | 35,525 (9.1%)   | -0.03 |
| Insulin                                                            | 140,132 (26.4%) | 139,187 (14.4%) | -0.30 | 77,967 (20.0%)  | 76,981 (19.8%)  | -0.01 |
| No use of anti-DM medications in prior 365 days                    | 44,888 (8.4%)   | 131,782 (13.7%) | 0.17  | 40,033 (10.3%)  | 39,483 (10.1%)  | -0.01 |
| Past use of metformin                                              | 343,976 (64.7%) | 601,379 (62.4%) | -0.05 | 254,447 (65.3%) | 261,062 (67.0%) | 0.04  |
| Past use of sulfonylureas                                          | 142,588 (26.8%) | 312,930 (32.5%) | 0.13  | 111,485 (28.6%) | 114,144 (29.3%) | 0.02  |
| Past use of thiazolidinediones                                     | 32,965 (6.2%)   | 50,092 (5.2%)   | -0.04 | 22,657 (5.8%)   | 22,475 (5.8%)   | 0.00  |
| Past use of GLP-1RA                                                | 78,771 (14.8%)  | 16,748 (1.7%)   | -0.49 | 24,901 (6.4%)   | 15,065 (3.9%)   | -0.11 |
| Past use of insulin                                                | 103,305 (19.4%) | 98,698 (10.2%)  | -0.26 | 57,037 (14.6%)  | 54,719 (14.1%)  | -0.01 |
| Long term use of insulin                                           | 75,972 (14.3%)  | 76,363 (7.9%)   | -0.20 | 40,626 (10.4%)  | 40,298 (10.3%)  | 0.00  |
| Miscellaneous anti-DM medications                                  | 8,743 (1.6%)    | 20,116 (2.1%)   | 0.04  | 6,547 (1.7%)    | 6,627 (1.7%)    | 0.00  |
| <b>Comorbid conditions; n (%)</b>                                  |                 |                 |       |                 |                 |       |
| Hypertension                                                       | 416,853 (78.5%) | 790,874 (82.1%) | 0.09  | 304,807 (78.3%) | 304,512 (78.2%) | 0.00  |
| Hyperlipidemia                                                     | 419,954 (79.0%) | 770,934 (80.0%) | 0.02  | 304,587 (78.2%) | 304,319 (78.1%) | 0.00  |
| Cardiovascular disease                                             | 161,835 (30.5%) | 363,460 (37.7%) | 0.15  | 118,619 (30.5%) | 117,292 (30.1%) | -0.01 |
| Hypokalemia                                                        | 11,628 (2.2%)   | 30,186 (3.1%)   | 0.06  | 8,566 (2.2%)    | 8,595 (2.2%)    | 0.00  |
| Hyperkalemia                                                       | 5,427 (1.0%)    | 15,529 (1.6%)   | 0.05  | 4,048 (1.0%)    | 3,997 (1.0%)    | 0.00  |
| Acute myocardial infarction                                        | 10,717 (2.0%)   | 20,489 (2.1%)   | 0.01  | 7,046 (1.8%)    | 6,919 (1.8%)    | 0.00  |
| Myocardial infarction sequelae                                     | 19,931 (3.8%)   | 40,387 (4.2%)   | 0.02  | 13,739 (3.5%)   | 13,665 (3.5%)   | 0.00  |
| Stable angina                                                      | 26,968 (5.1%)   | 47,526 (4.9%)   | -0.01 | 18,502 (4.8%)   | 18,380 (4.7%)   | 0.00  |
| Unstable angina                                                    | 12,379 (2.3%)   | 23,768 (2.5%)   | 0.01  | 8,421 (2.2%)    | 8,343 (2.1%)    | -0.01 |
| Coronary atherosclerosis                                           | 110,141 (20.7%) | 236,281 (24.5%) | 0.09  | 79,582 (20.4%)  | 78,651 (20.2%)  | 0.00  |
| Coronary procedure                                                 | 10,787 (2.0%)   | 17,498 (1.8%)   | -0.01 | 6,951 (1.8%)    | 6,940 (1.8%)    | 0.00  |

|                                                    |                 |                 |       |                 |                 |       |
|----------------------------------------------------|-----------------|-----------------|-------|-----------------|-----------------|-------|
| History of coronary procedure                      | 38,266 (7.2%)   | 77,343 (8.0%)   | 0.03  | 26,875 (6.9%)   | 26,795 (6.9%)   | 0.00  |
| Congestive heart failure                           | 43,993 (8.3%)   | 108,445 (11.3%) | 0.10  | 30,258 (7.8%)   | 29,856 (7.7%)   | 0.00  |
| Cardiomyopathy                                     | 18,110 (3.4%)   | 37,005 (3.8%)   | 0.02  | 11,877 (3.0%)   | 11,657 (3.0%)   | 0.00  |
| Atrial fibrillation                                | 38,600 (7.3%)   | 99,942 (10.4%)  | 0.11  | 28,818 (7.4%)   | 28,444 (7.3%)   | 0.00  |
| Cardiac conduction disorders                       | 20,750 (3.9%)   | 48,057 (5.0%)   | 0.05  | 14,758 (3.8%)   | 14,572 (3.7%)   | -0.01 |
| Other cardiac dysrhythmia                          | 52,184 (9.8%)   | 122,458 (12.7%) | 0.09  | 38,136 (9.8%)   | 37,685 (9.7%)   | 0.00  |
| Valve disorders                                    | 43,819 (8.2%)   | 110,627 (11.5%) | 0.11  | 32,718 (8.4%)   | 32,539 (8.4%)   | 0.00  |
| Other cardiovascular disease                       | 57,244 (10.8%)  | 110,905 (11.5%) | 0.02  | 40,432 (10.4%)  | 40,166 (10.3%)  | 0.00  |
| Ischemic stroke                                    | 34,975 (6.6%)   | 95,254 (9.9%)   | 0.12  | 27,158 (7.0%)   | 26,909 (6.9%)   | 0.00  |
| Transient ischemic attack                          | 8,227 (1.5%)    | 24,058 (2.5%)   | 0.07  | 6,464 (1.7%)    | 6,387 (1.6%)    | -0.01 |
| Other cerebrovascular conditions                   | 22,931 (4.3%)   | 68,025 (7.1%)   | 0.12  | 17,829 (4.6%)   | 17,736 (4.6%)   | 0.00  |
| Peripheral arterial disease                        | 40,098 (7.5%)   | 110,451 (11.5%) | 0.14  | 30,878 (7.9%)   | 30,640 (7.9%)   | 0.00  |
| Acute Kidney Injury                                | 13,150 (2.5%)   | 51,596 (5.4%)   | 0.15  | 10,108 (2.6%)   | 9,964 (2.6%)    | 0.00  |
| CKD                                                | 52,477 (9.9%)   | 179,569 (18.6%) | 0.25  | 41,222 (10.6%)  | 40,647 (10.4%)  | -0.01 |
| CKD Stage 1-2                                      | 18,061 (3.4%)   | 39,434 (4.1%)   | 0.04  | 13,104 (3.4%)   | 13,049 (3.4%)   | 0.00  |
| CKD Stage 3-4                                      | 30,232 (5.7%)   | 127,393 (13.2%) | 0.26  | 25,285 (6.5%)   | 24,807 (6.4%)   | 0.00  |
| CKD Stage 3                                        | 28,633 (5.4%)   | 120,642 (12.5%) | 0.25  | 24,176 (6.2%)   | 23,726 (6.1%)   | 0.00  |
| CKD Stage 4                                        | 3,015 (0.6%)    | 20,755 (2.2%)   | 0.14  | 2,395 (0.6%)    | 2,335 (0.6%)    | 0.00  |
| CKD unspecified                                    | 16,639 (3.1%)   | 72,388 (7.5%)   | 0.20  | 13,109 (3.4%)   | 12,837 (3.3%)   | -0.01 |
| Hypertensive nephropathy                           | 29,497 (5.6%)   | 93,281 (9.7%)   | 0.15  | 21,631 (5.6%)   | 21,458 (5.5%)   | 0.00  |
| Miscellaneous kidney disease                       | 34,382 (6.5%)   | 110,304 (11.5%) | 0.18  | 27,182 (7.0%)   | 26,753 (6.9%)   | 0.00  |
| Urinary tract infection                            | 52,721 (9.9%)   | 153,298 (15.9%) | 0.18  | 42,122 (10.8%)  | 42,205 (10.8%)  | 0.00  |
| Kidney and urinary stone                           | 21,076 (4.0%)   | 42,089 (4.4%)   | 0.02  | 15,667 (4.0%)   | 15,692 (4.0%)   | 0.00  |
| Disorders of electrolyte                           | 26,907 (5.1%)   | 73,771 (7.7%)   | 0.11  | 20,002 (5.1%)   | 19,875 (5.1%)   | 0.00  |
| Disorders of fluid balance                         | 14,158 (2.7%)   | 42,869 (4.5%)   | 0.10  | 10,775 (2.8%)   | 10,505 (2.7%)   | -0.01 |
| Edema                                              | 44,819 (8.4%)   | 107,259 (11.1%) | 0.09  | 33,149 (8.5%)   | 32,958 (8.5%)   | 0.00  |
| COPD                                               | 42,584 (8.0%)   | 111,250 (11.5%) | 0.12  | 33,037 (8.5%)   | 32,937 (8.5%)   | 0.00  |
| Asthma                                             | 41,991 (7.9%)   | 80,460 (8.4%)   | 0.02  | 30,521 (7.8%)   | 30,566 (7.8%)   | 0.00  |
| Obstructive sleep apnea                            | 100,443 (18.9%) | 127,801 (13.3%) | -0.15 | 64,969 (16.7%)  | 64,851 (16.7%)  | 0.00  |
| Pneumonia                                          | 18,003 (3.4%)   | 47,783 (5.0%)   | 0.08  | 13,507 (3.5%)   | 13,301 (3.4%)   | -0.01 |
| Osteoarthritis                                     | 103,513 (19.5%) | 216,960 (22.5%) | 0.07  | 77,830 (20.0%)  | 77,803 (20.0%)  | 0.00  |
| Osteoporosis without fractures                     | 18,668 (3.5%)   | 63,639 (6.6%)   | 0.14  | 15,531 (4.0%)   | 15,531 (4.0%)   | 0.00  |
| Fractures                                          | 7,406 (1.4%)    | 17,479 (1.8%)   | 0.03  | 5,631 (1.4%)    | 5,648 (1.5%)    | 0.01  |
| Falls                                              | 16,866 (3.2%)   | 41,710 (4.3%)   | 0.06  | 12,869 (3.3%)   | 12,815 (3.3%)   | 0.00  |
| NASH/NAFLD                                         | 31,463 (5.9%)   | 42,931 (4.5%)   | -0.06 | 21,484 (5.5%)   | 21,450 (5.5%)   | 0.00  |
| Liver disease                                      | 13,624 (2.6%)   | 30,637 (3.2%)   | 0.04  | 10,304 (2.6%)   | 10,224 (2.6%)   | 0.00  |
| Depression                                         | 74,447 (14.0%)  | 134,430 (14.0%) | 0.00  | 52,814 (13.6%)  | 52,710 (13.5%)  | 0.00  |
| Anxiety and sleep disorders                        | 100,058 (18.8%) | 172,514 (17.9%) | -0.02 | 70,850 (18.2%)  | 70,863 (18.2%)  | 0.00  |
| Cancer                                             | 35,753 (6.7%)   | 98,759 (10.3%)  | 0.13  | 28,660 (7.4%)   | 28,339 (7.3%)   | 0.00  |
| <b>Other medication use; n (%)</b>                 |                 |                 |       |                 |                 |       |
| No. of distinct medications; mean (sd)             | 12.53 (6.06)    | 12.40 (6.03)    | -0.02 | 12.11 (5.90)    | 12.09 (5.98)    | 0.00  |
| No. of distinct brand medications; mean (sd)       | 2.89 (1.92)     | 2.71 (1.94)     | -0.09 | 2.65 (1.82)     | 2.63 (1.82)     | -0.01 |
| ACE inhibitors or angiotensin II receptor blockers | 387,618 (73.0%) | 704,257 (73.1%) | 0.00  | 281,918 (72.4%) | 281,578 (72.3%) | 0.00  |
| Beta blockers                                      | 188,644 (35.5%) | 390,483 (40.5%) | 0.10  | 137,684 (35.4%) | 136,690 (35.1%) | -0.01 |
| Calcium channel blockers                           | 142,339 (26.8%) | 308,447 (32.0%) | 0.11  | 106,730 (27.4%) | 106,158 (27.3%) | 0.00  |
| Nitrates and other antianginal agents              | 32,293 (6.1%)   | 71,888 (7.5%)   | 0.06  | 23,195 (6.0%)   | 22,797 (5.9%)   | 0.00  |



|                                                                    |                 |                 |       |                 |                 |       |
|--------------------------------------------------------------------|-----------------|-----------------|-------|-----------------|-----------------|-------|
| Thiazide and thiazide-like diuretics                               | 73,784 (13.9%)  | 140,737 (14.6%) | 0.02  | 53,456 (13.7%)  | 53,297 (13.7%)  | 0.00  |
| Loop diuretics                                                     | 64,499 (12.1%)  | 156,002 (16.2%) | 0.12  | 46,067 (11.8%)  | 45,439 (11.7%)  | 0.00  |
| Mineralocorticoid receptor antagonists                             | 22,806 (4.3%)   | 37,536 (3.9%)   | -0.02 | 14,276 (3.7%)   | 14,108 (3.6%)   | -0.01 |
| Other potassium-sparing diuretics and antihypertensive medications | 22,514 (4.2%)   | 73,789 (7.7%)   | 0.15  | 18,747 (4.8%)   | 18,752 (4.8%)   | 0.00  |
| Digoxin                                                            | 6,853 (1.3%)    | 23,240 (2.4%)   | 0.08  | 5,446 (1.4%)    | 5,263 (1.4%)    | 0.00  |
| Antiarrhythmics                                                    | 8,140 (1.5%)    | 20,215 (2.1%)   | 0.05  | 5,797 (1.5%)    | 5,878 (1.5%)    | 0.00  |
| Anticoagulants                                                     | 36,342 (6.8%)   | 84,606 (8.8%)   | 0.07  | 26,476 (6.8%)   | 26,452 (6.8%)   | 0.00  |
| Antiplatelet agents                                                | 54,812 (10.3%)  | 112,132 (11.6%) | 0.04  | 39,170 (10.1%)  | 38,620 (9.9%)   | -0.01 |
| Statins                                                            | 385,751 (72.6%) | 688,296 (71.5%) | -0.02 | 277,161 (71.2%) | 276,857 (71.1%) | 0.00  |
| PCSK9 inhibitors and other-lipid lowering agents                   | 85,042 (16.0%)  | 150,256 (15.6%) | -0.01 | 59,731 (15.3%)  | 59,687 (15.3%)  | 0.00  |
| COPD & asthma medications                                          | 90,746 (17.1%)  | 174,863 (18.2%) | 0.03  | 66,866 (17.2%)  | 66,829 (17.2%)  | 0.00  |
| Oral corticosteroids                                               | 92,069 (17.3%)  | 167,086 (17.3%) | 0.00  | 67,319 (17.3%)  | 67,333 (17.3%)  | 0.00  |
| Antiosteoporosis agents                                            | 12,619 (2.4%)   | 45,412 (4.7%)   | 0.12  | 10,674 (2.7%)   | 10,602 (2.7%)   | 0.00  |
| NSAIDs                                                             | 144,473 (27.2%) | 246,709 (25.6%) | -0.04 | 104,854 (26.9%) | 105,155 (27.0%) | 0.00  |
| Opioids                                                            | 162,011 (30.5%) | 319,040 (33.1%) | 0.06  | 120,217 (30.9%) | 120,095 (30.8%) | 0.00  |
| Gabapentinoids                                                     | 79,519 (15.0%)  | 147,234 (15.3%) | 0.01  | 56,525 (14.5%)  | 56,587 (14.5%)  | 0.00  |
| Antibiotics targeting urinary tract infection                      | 101,783 (19.2%) | 231,563 (24.0%) | 0.12  | 78,017 (20.0%)  | 78,064 (20.0%)  | 0.00  |
| Antidepressants                                                    | 147,166 (27.7%) | 252,203 (26.2%) | -0.03 | 103,734 (26.6%) | 103,485 (26.6%) | 0.00  |
| Anxiolytics/hypnotics                                              | 40,783 (7.7%)   | 74,526 (7.7%)   | 0.00  | 29,253 (7.5%)   | 29,337 (7.5%)   | 0.00  |
| Benzodiazepines                                                    | 63,910 (12.0%)  | 127,430 (13.2%) | 0.04  | 47,550 (12.2%)  | 47,573 (12.2%)  | 0.00  |
| Antipsychotics                                                     | 12,961 (2.4%)   | 28,447 (3.0%)   | 0.04  | 9,311 (2.4%)    | 9,297 (2.4%)    | 0.00  |
| Antiparkinsonian medications                                       | 14,013 (2.6%)   | 28,619 (3.0%)   | 0.02  | 10,124 (2.6%)   | 10,082 (2.6%)   | 0.00  |
| Dementia medications                                               | 5,930 (1.1%)    | 33,237 (3.5%)   | 0.16  | 5,248 (1.3%)    | 5,212 (1.3%)    | 0.00  |
| Potassium binders                                                  | 299 (0.1%)      | 1,395 (0.1%)    | 0.00  | 248 (0.1%)      | 230 (0.1%)      | 0.00  |
| Potassium supplements                                              | 37,866 (7.1%)   | 90,964 (9.4%)   | 0.08  | 28,010 (7.2%)   | 27,929 (7.2%)   | 0.00  |
| Angiotensin receptor-neprilysin inhibitor                          | 4,672 (0.9%)    | 1,903 (0.2%)    | -0.09 | 1,485 (0.4%)    | 1,409 (0.4%)    | 0.00  |
| <b>Measures of healthcare utilization; n (%)</b>                   |                 |                 |       |                 |                 |       |
| Internist visit within prior 31-365 days; n (%)                    | 455,482 (85.7%) | 827,156 (85.9%) | 0.01  | 333,182 (85.6%) | 333,343 (85.6%) | 0.00  |
| Internist visit within prior 30 days; n (%)                        | 344,810 (64.9%) | 658,254 (68.3%) | 0.07  | 261,666 (67.2%) | 262,575 (67.4%) | 0.00  |
| No. of internist visits; mean (sd)                                 | 14.60 (19.38)   | 15.45 (19.65)   | 0.04  | 14.56 (18.90)   | 14.56 (19.34)   | 0.00  |
| Endocrinologist within prior 31-365 days; n (%)                    | 83,170 (15.7%)  | 88,553 (9.2%)   | -0.20 | 44,682 (11.5%)  | 43,912 (11.3%)  | -0.01 |
| Endocrinologist within prior 30 days; n (%)                        | 74,793 (14.1%)  | 74,986 (7.8%)   | -0.20 | 38,488 (9.9%)   | 37,862 (9.7%)   | -0.01 |
| No. of endocrinologist visits; mean (sd)                           | 1.61 (5.91)     | 0.90 (4.42)     | -0.14 | 1.14 (4.99)     | 1.11 (4.99)     | -0.01 |
| Cardiologist visit within prior 31-365 days; n (%)                 | 161,546 (30.4%) | 337,837 (35.1%) | 0.10  | 117,705 (30.2%) | 116,815 (30.0%) | 0.00  |
| Cardiologist visit within prior 30 days; n (%)                     | 52,029 (9.8%)   | 114,323 (11.9%) | 0.07  | 36,864 (9.5%)   | 36,273 (9.3%)   | -0.01 |
| No. of cardiologist visits; mean (sd)                              | 2.43 (6.43)     | 3.04 (7.43)     | 0.09  | 2.38 (6.39)     | 2.35 (6.19)     | 0.00  |
| Nephrologist within prior 31-365 days; n (%)                       | 17,855 (3.4%)   | 61,270 (6.4%)   | 0.14  | 13,364 (3.4%)   | 13,278 (3.4%)   | 0.00  |
| Nephrologist within prior 30 days; n (%)                           | 5,954 (1.1%)    | 22,831 (2.4%)   | 0.10  | 4,202 (1.1%)    | 4,054 (1.0%)    | -0.01 |
| No. of nephrologist visits; mean (sd)                              | 0.18 (2.06)     | 0.38 (2.62)     | 0.08  | 0.18 (2.23)     | 0.18 (1.65)     | 0.00  |
| No. of electrocardiograms; mean (sd)                               | 1.04 (2.09)     | 1.26 (2.31)     | 0.10  | 1.03 (2.05)     | 1.02 (1.99)     | 0.00  |
| No. of cardiac angiographies or echocardiographies; mean (sd)      | 0.67 (2.61)     | 0.65 (2.09)     | -0.01 | 0.59 (2.22)     | 0.59 (2.26)     | 0.00  |
| Cardiovascular stress test; n (%)                                  | 54,007 (10.2%)  | 104,404 (10.8%) | 0.02  | 39,161 (10.1%)  | 38,873 (10.0%)  | 0.00  |
| No. of HbA1c tests ordered; mean (sd)                              | 2.53 (1.46)     | 2.38 (1.42)     | -0.10 | 2.44 (1.41)     | 2.45 (1.43)     | 0.01  |
| No. of glucose test ordered; mean (sd)                             | 0.83 (2.02)     | 0.84 (3.43)     | 0.00  | 0.77 (2.01)     | 0.76 (1.82)     | -0.01 |
| No. of microalbuminuria tests ordered; mean (sd)                   | 0.96 (1.06)     | 0.87 (1.05)     | -0.09 | 0.90 (1.03)     | 0.90 (1.03)     | 0.00  |
| No. of metabolic or creatinine tests ordered; mean (sd)            | 2.72 (2.53)     | 3.01 (2.77)     | 0.11  | 2.69 (2.52)     | 2.69 (2.47)     | 0.00  |

|                                                    |                 |                 |       |                 |                 |       |
|----------------------------------------------------|-----------------|-----------------|-------|-----------------|-----------------|-------|
| No. of lipid tests ordered; mean (sd)              | 1.95 (1.74)     | 1.88 (1.68)     | -0.04 | 1.91 (1.70)     | 1.92 (1.74)     | 0.01  |
| No. of hospitalizations; mean (sd)                 | 0.12 (0.44)     | 0.20 (0.60)     | 0.15  | 0.12 (0.45)     | 0.12 (0.43)     | 0.00  |
| Hospitalization within prior 365 days; n (%)       | 29,158 (7.7%)   | 45,734 (9.9%)   | 0.08  | 19,199 (7.4%)   | 19,697 (7.6%)   | 0.01  |
| Hospitalization within prior 31-365 days; n (%)    | 24,638 (6.5%)   | 34,432 (7.5%)   | 0.04  | 15,934 (6.2%)   | 15,865 (6.2%)   | 0.00  |
| Hospitalization within prior 30 days; n (%)        | 5,554 (1.5%)    | 14,022 (3.0%)   | 0.10  | 3,977 (1.5%)    | 4,521 (1.8%)    | 0.02  |
| Length of stay within prior 365 days; mean (sd)    | 0.54 (2.83)     | 1.11 (4.92)     | 0.14  | 0.57 (2.93)     | 0.57 (2.87)     | 0.00  |
| Length of stay within prior 31-365 days; mean (sd) | 0.46 (2.62)     | 0.78 (4.12)     | 0.09  | 0.47 (2.67)     | 0.48 (2.69)     | 0.00  |
| Length of stay within prior 30 days; mean (sd)     | 0.08 (0.83)     | 0.33 (2.04)     | 0.16  | 0.09 (0.91)     | 0.09 (0.80)     | 0.00  |
| No. of emergency department visits; mean (sd)      | 0.37 (1.17)     | 0.60 (1.59)     | 0.16  | 0.40 (1.25)     | 0.40 (1.15)     | 0.00  |
| Vitamin D test order; n (%)                        | 147,439 (27.7%) | 278,389 (28.9%) | 0.03  | 106,754 (27.4%) | 106,557 (27.4%) | 0.00  |
| Serum potassium test order; n (%)                  | 12,535 (2.4%)   | 27,895 (2.9%)   | 0.03  | 9,266 (2.4%)    | 9,238 (2.4%)    | 0.00  |
| <b>Laboratory results<sup>§</sup>, mean (sd)</b>   |                 |                 |       |                 |                 |       |
| HbA1c, %                                           | 9.0 (2.4)       | 8.8 (2.4)       | -0.06 | 8.9 (2.4)       | 9.0 (2.4)       | 0.01  |
| Missing                                            | 420,960 (79.2%) | 841,191 (87.3%) | 0.22  | 319,227 (82.0%) | 317,755 (81.6%) | -0.01 |
| eGFR, ml/min/1.73m <sup>2</sup>                    | 80 (23)         | 76 (24)         | -0.18 | 80 (23)         | 79 (23)         | -0.05 |
| Missing                                            | 418,667 (78.8%) | 835,277 (86.7%) | 0.21  | 317,094 (81.4%) | 315,273 (81.0%) | -0.01 |
| Urinary albumin-to-creatinine ratio, mg/g          | 102 (465)       | 104 (508)       | 0.00  | 97 (468)        | 99 (496)        | 0.00  |
| Missing                                            | 478,126 (90.0%) | 907,342 (94.2%) | 0.16  | 357,098 (91.7%) | 355,688 (91.3%) | -0.01 |
| Total cholesterol, mg/dL                           | 184 (59)        | 185 (60)        | 0.02  | 186 (60)        | 187 (59)        | 0.01  |
| Missing                                            | 431,040 (81.1%) | 850,089 (88.3%) | 0.20  | 324,914 (83.4%) | 323,006 (82.9%) | -0.01 |
| LDL cholesterol, mg/dL                             | 102 (46)        | 103 (47)        | 0.03  | 103 (47)        | 105 (47)        | 0.03  |
| Missing                                            | 432,626 (81.4%) | 851,089 (88.4%) | 0.20  | 326,189 (83.8%) | 323,787 (83.1%) | -0.02 |
| HDL cholesterol, mg/dL                             | 47 (19)         | 48 (19)         | 0.04  | 48 (19)         | 48 (19)         | 0.02  |
| Missing                                            | 432,763 (81.4%) | 851,037 (88.3%) | 0.19  | 325,941 (83.7%) | 323,699 (83.1%) | -0.02 |
| Triglycerides, mg/dL                               | 211 (166)       | 198 (152)       | -0.08 | 210 (164)       | 204 (157)       | -0.04 |
| Missing                                            | 431,863 (81.3%) | 850,788 (88.3%) | 0.20  | 325,368 (83.5%) | 323,425 (83.0%) | -0.01 |
| Creatinine, mg/dL                                  | 1.00 (0.48)     | 1.04 (0.51)     | 0.08  | 0.99 (0.46)     | 1.01 (0.48)     | 0.04  |
| Missing                                            | 418,667 (78.8%) | 835,277 (86.7%) | 0.21  | 317,094 (81.4%) | 315,273 (81.0%) | -0.01 |
| Glucose, mg/dL                                     | 196 (95.6)      | 193 (95)        | -0.04 | 195 (95)        | 197 (97)        | 0.02  |
| Missing                                            | 421,628 (79.4%) | 839,414 (87.1%) | 0.21  | 319,012 (81.9%) | 317,258 (81.5%) | -0.01 |
| Potassium, mmol/L                                  | 4.4 (0.4)       | 4.4 (0.4)       | 0.03  | 4.4 (0.4)       | 4.4 (0.4)       | 0.00  |
| Missing                                            | 420,413 (79.1%) | 837,089 (86.9%) | 0.21  | 318,251 (81.7%) | 316,349 (81.2%) | -0.01 |

ACE = angiotensin-converting enzyme; CDM = Optum's de-identified Clinformatics® Data Mart Database; CKD = chronic kidney disease; COPD = chronic obstructive pulmonary disease; DPP-4i = dipeptidyl peptidase-4 inhibitor; eGFR = estimated glomerular filtration rate; GLP-1RA = glucagon-like peptide-1 receptor agonist; HbA1c = hemoglobin A1c; HDL = high-density lipoprotein; LDL = low-density lipoprotein; n = number of patients; NASH = non-alcoholic steatohepatitis; NAFLD = non-alcoholic fatty liver disease; No. = number of; NSAIDs = Nonsteroidal anti-inflammatory drug; PCSK9 = Proprotein convertase subtilisin/kexin type 9; SGLT2i = sodium-glucose cotransporter-2 inhibitor; sd = standard deviation; SMD = standardized mean difference.

‡ Only available in CDM and Medicare databases. Percentages are relative to sample size of CDM and Medicare databases so total adds up to 100%.

\* Northeast (Connecticut, Massachusetts, Maine, New Hampshire, New Jersey, New York, Pennsylvania, Rhode Island, Vermont); South (Alabama; Arkansas; Delaware; Florida; Georgia; Kentucky; Louisiana; Maryland; Mississippi; North Carolina; Oklahoma; South Carolina; Tennessee; Texas; Virginia; Washington, DC; West Virginia); Midwest (Illinois, Indiana, Iowa, Kansas, Michigan, Minnesota, Missouri, Nebraska, North Dakota, Ohio, South Dakota, Wisconsin); West (Alaska, Arizona, California, Colorado, Hawai'i, Idaho, Montana, New Mexico, Nevada, Oregon, Utah, Washington, Wyoming).

† Based on: Gagne JJ, Glynn RJ, Avorn J, Levin R, Schneeweiss S. A combined comorbidity score predicted mortality in elderly patients better than existing scores. *J Clin Epidemiol.* 2011;64(7):749-59.

‡ Based on: Kim DH, Schneeweiss S, Glynn RJ, Lipsitz LA, Rockwood K, Avorn J. Measuring Frailty in Medicare Data: Development and Validation of a Claims-Based Frailty Index. *J Gerontol A Biol Sci Med Sci.* 2018;73(7):980-7

§ Pooled across CDM and MarketScan databases

|| Calculated with the CKD-EPI 2021 creatinine-based equation

**Supplemental Table 4.** Full list of baseline characteristics in patients with type 2 diabetes, stratified by GLP-1RA vs. DPP-4i initiation in the pooled cohort, before and after 1:1 propensity score matching.

| Covariates                                         | Before matching    |                     |          | After propensity score matching |                     |          |
|----------------------------------------------------|--------------------|---------------------|----------|---------------------------------|---------------------|----------|
|                                                    | Exposure - GLP-1RA | Comparator - DPP-4i | St. Diff | Exposure - GLP-1RA              | Comparator - DPP-4i | St. Diff |
| Number of patients                                 | 519,012            | 999,728             |          | 364,910                         | 364,910             |          |
| <b>Demographics</b>                                |                    |                     |          |                                 |                     |          |
| Age; mean (sd)                                     | 60.7 (9.8)         | 67.5 (9.7)          | 0.70     | 62.3 (9.5)                      | 62.2 (9.5)          | -0.01    |
| Male; n (%)                                        | 242,066 (46.6%)    | 494,425 (49.5%)     | 0.06     | 175,506 (48.1%)                 | 175,496 (48.1%)     | 0.00     |
| Female; n (%)                                      | 276,948 (53.4%)    | 505,307 (50.5%)     | -0.06    | 189,404 (51.9%)                 | 189,415 (51.9%)     | 0.00     |
| Race/ethnicity <sup>‡</sup> ; n (%)                |                    |                     |          |                                 |                     |          |
| White                                              | 242,155 (71.9%)    | 503,778 (69.5%)     | 0.07     | 169,932 (72.2%)                 | 170,330 (72.3%)     | 0.00     |
| Black                                              | 39,749 (11.8%)     | 85,818 (11.8%)      | 0.03     | 27,134 (11.5%)                  | 26,972 (11.5%)      | 0.00     |
| Asian                                              | 7,222 (2.1%)       | 38,101 (5.3%)       | 0.15     | 6,022 (2.6%)                    | 5,734 (2.4%)        | -0.01    |
| Hispanic                                           | 32,268 (9.6%)      | 63,252 (8.7%)       | 0.00     | 21,824 (9.3%)                   | 21,886 (9.3%)       | 0.00     |
| Other                                              | 15,239 (4.5%)      | 33,597 (4.6%)       | 0.03     | 10,588 (4.5%)                   | 10,578 (4.5%)       | 0.00     |
| Calendar time; n (%)                               |                    |                     |          |                                 |                     |          |
| 2013                                               | 26,613 (5.1%)      | 121,055 (12.1%)     | 0.25     | 24,789 (6.8%)                   | 24,152 (6.6%)       | -0.01    |
| 2014                                               | 37,414 (7.2%)      | 167,974 (16.8%)     | 0.30     | 34,446 (9.4%)                   | 33,579 (9.2%)       | -0.01    |
| 2015                                               | 44,723 (8.6%)      | 154,571 (15.5%)     | 0.21     | 39,425 (10.8%)                  | 39,057 (10.7%)      | 0.00     |
| 2016                                               | 51,310 (9.9%)      | 138,958 (13.9%)     | 0.12     | 43,577 (11.9%)                  | 43,833 (12.0%)      | 0.00     |
| 2017                                               | 62,316 (12.0%)     | 128,758 (12.9%)     | 0.03     | 49,656 (13.6%)                  | 50,104 (13.7%)      | 0.00     |
| 2018                                               | 76,958 (14.8%)     | 114,357 (11.4%)     | -0.10    | 55,628 (15.2%)                  | 56,153 (15.4%)      | 0.01     |
| 2019                                               | 98,317 (18.9%)     | 106,325 (10.6%)     | -0.24    | 62,765 (17.2%)                  | 63,242 (17.3%)      | 0.00     |
| 2020                                               | 63,269 (12.2%)     | 40,217 (4.0%)       | -0.30    | 31,906 (8.7%)                   | 32,066 (8.8%)       | 0.00     |
| 2021                                               | 45,612 (8.8%)      | 22,256 (2.2%)       | -0.29    | 18,260 (5.0%)                   | 18,243 (5.0%)       | 0.00     |
| 2022                                               | 12,480 (2.4%)      | 5,257 (0.5%)        | -0.16    | 4,458 (1.2%)                    | 4,481 (1.2%)        | 0.00     |
| Region <sup>*</sup> ; n (%)                        |                    |                     |          |                                 |                     |          |
| Northeast                                          | 65,521 (12.6%)     | 172,729 (17.3%)     | 0.13     | 49,698 (13.6%)                  | 48,791 (13.4%)      | -0.01    |
| South                                              | 259,930 (50.1%)    | 456,794 (45.7%)     | -0.09    | 180,872 (49.6%)                 | 181,708 (49.8%)     | 0.00     |
| Midwest                                            | 113,389 (21.8%)    | 202,411 (20.2%)     | -0.04    | 77,165 (21.1%)                  | 77,261 (21.2%)      | 0.00     |
| West                                               | 80,172 (15.4%)     | 167,794 (16.8%)     | 0.04     | 57,175 (15.7%)                  | 57,150 (15.7%)      | 0.00     |
| Medicare Advantage; n (%)                          | 2,927 (0.6%)       | 4,885 (0.5%)        | -0.01    | 2,065 (0.6%)                    | 1,934 (0.5%)        | -0.01    |
| Combined comorbidity score; mean (sd) <sup>‡</sup> | 1.4 (2.0)          | 1.4 (2.3)           | 0.03     | 1.3 (2.0)                       | 1.3 (2.0)           | 0.00     |
| Frailty score; mean (sd) <sup>†</sup>              | 0.16 (0.05)        | 0.17 (0.05)         | 0.20     | 0.16 (0.05)                     | 0.16 (0.05)         | 0.00     |
| Frailty score squared; mean (sd) <sup>†</sup>      | 0.03 (0.02)        | 0.03 (0.03)         | 0.00     | 0.03 (0.02)                     | 0.03 (0.02)         | 0.00     |
| Frailty score categories; n (%)                    |                    |                     |          |                                 |                     |          |
| 0.00 - 0.14                                        | 252,226 (48.6%)    | 419,026 (41.9%)     | -0.13    | 176,427 (48.3%)                 | 176,974 (48.5%)     | 0.00     |
| 0.15 - 0.24                                        | 232,631 (44.8%)    | 478,194 (47.8%)     | 0.06     | 163,239 (44.7%)                 | 162,415 (44.5%)     | 0.00     |
| >= 0.25                                            | 34,155 (6.6%)      | 102,508 (10.3%)     | 0.13     | 25,244 (6.9%)                   | 25,521 (7.0%)       | 0.00     |
| <b>Lifestyle factors; n (%)</b>                    |                    |                     |          |                                 |                     |          |
| Overweight                                         | 37,171 (7.2%)      | 75,839 (7.6%)       | 0.02     | 27,440 (7.5%)                   | 27,754 (7.6%)       | 0.00     |
| Obesity                                            | 253,498 (48.8%)    | 268,712 (26.9%)     | -0.46    | 151,390 (41.5%)                 | 152,188 (41.7%)     | 0.00     |
| Obese (BMI 30-35 kg/m <sup>2</sup> )               | 91,175 (17.6%)     | 109,241 (10.9%)     | -0.19    | 53,870 (14.8%)                  | 62,070 (17.0%)      | 0.06     |
| Severe obese (BMI>35 kg/m <sup>2</sup> )           | 120,696 (23.3%)    | 91,171 (9.1%)       | -0.39    | 67,362 (18.5%)                  | 57,496 (15.8%)      | -0.07    |
| Smoking                                            | 100,110 (19.3%)    | 174,717 (17.5%)     | -0.05    | 67,006 (18.4%)                  | 67,246 (18.4%)      | 0.00     |

|                                                                    |                 |                 |       |                 |                 |       |
|--------------------------------------------------------------------|-----------------|-----------------|-------|-----------------|-----------------|-------|
| Alcohol abuse or dependence                                        | 4,929 (0.9%)    | 10,454 (1.0%)   | 0.01  | 3,458 (0.9%)    | 3,445 (0.9%)    | 0.00  |
| Drug abuse or dependence                                           | 10,527 (2.0%)   | 15,405 (1.5%)   | -0.04 | 6,680 (1.8%)    | 6,742 (1.8%)    | 0.00  |
| <b>Diabetes-related conditions; n (%)</b>                          |                 |                 |       |                 |                 |       |
| Diabetic nephropathy                                               | 78,379 (15.1%)  | 135,479 (13.6%) | -0.04 | 51,426 (14.1%)  | 51,345 (14.1%)  | 0.00  |
| Diabetic retinopathy                                               | 55,732 (10.7%)  | 94,320 (9.4%)   | -0.04 | 35,787 (9.8%)   | 35,378 (9.7%)   | 0.00  |
| Diabetes with other ophthalmic manifestations                      | 33,988 (6.5%)   | 99,198 (9.9%)   | 0.12  | 26,121 (7.2%)   | 26,124 (7.2%)   | 0.00  |
| Diabetic neuropathy                                                | 120,607 (23.2%) | 194,838 (19.5%) | -0.09 | 77,527 (21.2%)  | 77,020 (21.1%)  | 0.00  |
| Diabetes with peripheral circulatory disorders                     | 6,210 (1.2%)    | 31,626 (3.2%)   | 0.14  | 5,600 (1.5%)    | 5,535 (1.5%)    | 0.00  |
| Diabetic foot                                                      | 14,175 (2.7%)   | 24,664 (2.5%)   | -0.01 | 8,936 (2.4%)    | 8,820 (2.4%)    | 0.00  |
| Infection of lower extremities (cellulitis or osteomyelitis)       | 24,297 (4.7%)   | 47,177 (4.7%)   | 0.00  | 16,348 (4.5%)   | 16,371 (4.5%)   | 0.00  |
| Lower-limb amputations                                             | 3,232 (0.6%)    | 4,585 (0.5%)    | -0.01 | 1,908 (0.5%)    | 1,891 (0.5%)    | 0.00  |
| Erectile Dysfunction                                               | 23,763 (4.6%)   | 40,104 (4.0%)   | -0.03 | 16,207 (4.4%)   | 16,240 (4.5%)   | 0.00  |
| Hypoglycemia                                                       | 62,639 (12.1%)  | 88,849 (8.9%)   | -0.10 | 38,539 (10.6%)  | 38,397 (10.5%)  | 0.00  |
| Hyperglycemia                                                      | 240,398 (46.3%) | 300,169 (30.0%) | -0.34 | 147,510 (40.4%) | 147,495 (40.4%) | 0.00  |
| Diabetic ketoacidosis                                              | 1,605 (0.3%)    | 3,107 (0.3%)    | 0.00  | 979 (0.3%)      | 995 (0.3%)      | 0.00  |
| Hyperosmolar hyperglycemic nonketotic syndrome                     | 4,455 (0.9%)    | 7,283 (0.7%)    | -0.02 | 2,901 (0.8%)    | 2,905 (0.8%)    | 0.00  |
| Diabetes with other complications                                  | 51,783 (10.0%)  | 74,562 (7.5%)   | -0.09 | 32,787 (9.0%)   | 32,765 (9.0%)   | 0.00  |
| Diabetes mellitus without mention of complications                 | 460,295 (88.7%) | 934,837 (93.5%) | 0.17  | 329,674 (90.3%) | 329,666 (90.3%) | 0.00  |
| <b>Diabetes treatment; n (%)</b>                                   |                 |                 |       |                 |                 |       |
| Number of anti-DM medications on day of entry to cohort; mean (sd) | 2.27 (0.91)     | 2.17 (0.80)     | -0.12 | 2.24 (0.90)     | 2.24 (0.84)     | 0.00  |
| Diabetes drugs on day of cohort entry                              |                 |                 |       |                 |                 |       |
| Metformin                                                          | 383,295 (73.9%) | 774,486 (77.5%) | 0.08  | 278,632 (76.4%) | 279,537 (76.6%) | 0.00  |
| Sulfonylureas                                                      | 177,076 (34.1%) | 424,664 (42.5%) | 0.17  | 136,649 (37.4%) | 137,785 (37.8%) | 0.01  |
| Thiazolidinediones                                                 | 43,984 (8.5%)   | 78,893 (7.9%)   | -0.02 | 31,244 (8.6%)   | 31,537 (8.6%)   | 0.00  |
| SGLT2i                                                             | 89,528 (17.2%)  | 74,489 (7.5%)   | -0.30 | 51,830 (14.2%)  | 51,994 (14.2%)  | 0.00  |
| Insulin                                                            | 185,215 (35.7%) | 139,356 (13.9%) | -0.52 | 96,000 (26.3%)  | 94,123 (25.8%)  | -0.01 |
| No use of anti-DM medications in prior 365 days                    | 47,121 (9.1%)   | 134,277 (13.4%) | 0.14  | 36,981 (10.1%)  | 35,997 (9.9%)   | -0.01 |
| Past use of metformin                                              | 294,769 (56.8%) | 627,553 (62.8%) | 0.12  | 216,862 (59.4%) | 224,862 (61.6%) | 0.05  |
| Past use of sulfonylureas                                          | 128,183 (24.7%) | 323,713 (32.4%) | 0.17  | 101,149 (27.7%) | 101,815 (27.9%) | 0.00  |
| Past use of thiazolidinediones                                     | 30,295 (5.8%)   | 52,418 (5.2%)   | -0.03 | 22,040 (6.0%)   | 20,700 (5.7%)   | -0.01 |
| Past use of SGLT2i                                                 | 60,379 (11.6%)  | 50,686 (5.1%)   | -0.24 | 35,217 (9.7%)   | 35,086 (9.6%)   | 0.00  |
| Past use of insulin                                                | 140,136 (27.0%) | 98,660 (9.9%)   | -0.45 | 72,990 (20.0%)  | 66,420 (18.2%)  | -0.05 |
| Long term use of insulin                                           | 108,247 (20.9%) | 76,395 (7.6%)   | -0.39 | 51,202 (14.0%)  | 49,155 (13.5%)  | -0.01 |
| Miscellaneous anti-DM medications                                  | 8,344 (1.6%)    | 20,608 (2.1%)   | 0.04  | 6,296 (1.7%)    | 6,367 (1.7%)    | 0.00  |
| <b>Comorbid conditions; n (%)</b>                                  |                 |                 |       |                 |                 |       |
| Hypertension                                                       | 408,690 (78.7%) | 818,298 (81.9%) | 0.08  | 288,327 (79.0%) | 288,447 (79.0%) | 0.00  |
| Hyperlipidemia                                                     | 402,582 (77.6%) | 799,668 (80.0%) | 0.06  | 283,838 (77.8%) | 283,746 (77.8%) | 0.00  |
| Cardiovascular disease                                             | 153,340 (29.5%) | 371,663 (37.2%) | 0.16  | 111,001 (30.4%) | 110,719 (30.3%) | 0.00  |
| Hypokalemia                                                        | 12,844 (2.5%)   | 30,608 (3.1%)   | 0.04  | 8,975 (2.5%)    | 9,015 (2.5%)    | 0.00  |
| Hyperkalemia                                                       | 6,513 (1.3%)    | 15,656 (1.6%)   | 0.03  | 4,637 (1.3%)    | 4,622 (1.3%)    | 0.00  |
| Acute myocardial infarction                                        | 8,393 (1.6%)    | 21,021 (2.1%)   | 0.04  | 5,773 (1.6%)    | 5,787 (1.6%)    | 0.00  |
| Myocardial infarction sequelae                                     | 18,022 (3.5%)   | 41,322 (4.1%)   | 0.03  | 12,679 (3.5%)   | 12,641 (3.5%)   | 0.00  |
| Stable angina                                                      | 24,039 (4.6%)   | 49,021 (4.9%)   | 0.01  | 16,539 (4.5%)   | 16,456 (4.5%)   | 0.00  |
| Unstable angina                                                    | 10,899 (2.1%)   | 24,401 (2.4%)   | 0.02  | 7,556 (2.1%)    | 7,521 (2.1%)    | 0.00  |
| Coronary atherosclerosis                                           | 99,339 (19.1%)  | 241,659 (24.2%) | 0.12  | 72,154 (19.8%)  | 71,756 (19.7%)  | 0.00  |
| Coronary procedure                                                 | 7,948 (1.5%)    | 18,048 (1.8%)   | 0.02  | 5,533 (1.5%)    | 5,439 (1.5%)    | 0.00  |

|                                                    |                 |                 |       |                 |                 |       |
|----------------------------------------------------|-----------------|-----------------|-------|-----------------|-----------------|-------|
| History of coronary procedure                      | 33,819 (6.5%)   | 79,104 (7.9%)   | 0.05  | 23,896 (6.5%)   | 23,929 (6.6%)   | 0.00  |
| Congestive heart failure                           | 43,195 (8.3%)   | 109,607 (11.0%) | 0.09  | 30,446 (8.3%)   | 30,430 (8.3%)   | 0.00  |
| Cardiomyopathy                                     | 15,009 (2.9%)   | 37,648 (3.8%)   | 0.05  | 10,615 (2.9%)   | 10,699 (2.9%)   | 0.00  |
| Atrial fibrillation                                | 36,228 (7.0%)   | 101,591 (10.2%) | 0.11  | 26,880 (7.4%)   | 26,898 (7.4%)   | 0.00  |
| Cardiac conduction disorders                       | 19,410 (3.7%)   | 48,992 (4.9%)   | 0.06  | 13,861 (3.8%)   | 13,789 (3.8%)   | 0.00  |
| Other cardiac dysrhythmia                          | 51,117 (9.8%)   | 125,097 (12.5%) | 0.09  | 36,159 (9.9%)   | 36,125 (9.9%)   | 0.00  |
| Valve disorders                                    | 40,161 (7.7%)   | 112,719 (11.3%) | 0.12  | 30,123 (8.3%)   | 30,053 (8.2%)   | 0.00  |
| Other cardiovascular disease                       | 56,762 (10.9%)  | 114,185 (11.4%) | 0.02  | 38,909 (10.7%)  | 38,840 (10.6%)  | 0.00  |
| Ischemic stroke                                    | 33,304 (6.4%)   | 96,949 (9.7%)   | 0.12  | 25,207 (6.9%)   | 25,176 (6.9%)   | 0.00  |
| Transient ischemic attack                          | 7,959 (1.5%)    | 24,518 (2.5%)   | 0.07  | 6,085 (1.7%)    | 6,071 (1.7%)    | 0.00  |
| Other cerebrovascular conditions                   | 24,054 (4.6%)   | 69,117 (6.9%)   | 0.10  | 17,916 (4.9%)   | 17,775 (4.9%)   | 0.00  |
| Peripheral arterial disease                        | 41,094 (7.9%)   | 112,504 (11.3%) | 0.12  | 30,505 (8.4%)   | 30,299 (8.3%)   | 0.00  |
| Acute Kidney Injury                                | 17,467 (3.4%)   | 51,672 (5.2%)   | 0.09  | 12,602 (3.5%)   | 12,640 (3.5%)   | 0.00  |
| CKD                                                | 71,349 (13.7%)  | 179,684 (18.0%) | 0.12  | 52,220 (14.3%)  | 52,247 (14.3%)  | 0.00  |
| CKD Stage 1-2                                      | 19,013 (3.7%)   | 40,245 (4.0%)   | 0.02  | 13,342 (3.7%)   | 13,305 (3.6%)   | -0.01 |
| CKD Stage 3-4                                      | 49,066 (9.5%)   | 126,509 (12.7%) | 0.10  | 36,350 (10.0%)  | 36,448 (10.0%)  | 0.00  |
| CKD Stage 3                                        | 46,742 (9.0%)   | 119,813 (12.0%) | 0.10  | 34,678 (9.5%)   | 34,729 (9.5%)   | 0.00  |
| CKD Stage 4                                        | 7,149 (1.4%)    | 20,334 (2.0%)   | 0.05  | 5,308 (1.5%)    | 5,334 (1.5%)    | 0.00  |
| CKD unspecified                                    | 24,435 (4.7%)   | 71,878 (7.2%)   | 0.11  | 18,283 (5.0%)   | 18,340 (5.0%)   | 0.00  |
| Hypertensive nephropathy                           | 39,075 (7.5%)   | 93,116 (9.3%)   | 0.06  | 27,531 (7.5%)   | 27,570 (7.6%)   | 0.00  |
| Miscellaneous kidney disease                       | 40,581 (7.8%)   | 111,130 (11.1%) | 0.11  | 30,570 (8.4%)   | 30,700 (8.4%)   | 0.00  |
| Urinary tract infection                            | 63,498 (12.2%)  | 156,079 (15.6%) | 0.10  | 46,481 (12.7%)  | 46,685 (12.8%)  | 0.00  |
| Kidney and urinary stone                           | 21,570 (4.2%)   | 42,953 (4.3%)   | 0.00  | 15,247 (4.2%)   | 15,409 (4.2%)   | 0.00  |
| Disorders of electrolyte                           | 29,772 (5.7%)   | 74,752 (7.5%)   | 0.07  | 20,908 (5.7%)   | 20,974 (5.7%)   | 0.00  |
| Disorders of fluid balance                         | 16,371 (3.2%)   | 43,451 (4.3%)   | 0.06  | 11,608 (3.2%)   | 11,505 (3.2%)   | 0.00  |
| Edema                                              | 54,255 (10.5%)  | 108,454 (10.8%) | 0.01  | 36,815 (10.1%)  | 36,721 (10.1%)  | 0.00  |
| COPD                                               | 46,567 (9.0%)   | 113,012 (11.3%) | 0.08  | 33,845 (9.3%)   | 33,811 (9.3%)   | 0.00  |
| Asthma                                             | 49,900 (9.6%)   | 82,193 (8.2%)   | -0.05 | 32,708 (9.0%)   | 32,818 (9.0%)   | 0.00  |
| Obstructive sleep apnea                            | 119,821 (23.1%) | 130,847 (13.1%) | -0.26 | 71,370 (19.6%)  | 71,505 (19.6%)  | 0.00  |
| Pneumonia                                          | 20,017 (3.9%)   | 48,503 (4.9%)   | 0.05  | 13,978 (3.8%)   | 13,922 (3.8%)   | 0.00  |
| Osteoarthritis                                     | 115,791 (22.3%) | 222,644 (22.3%) | 0.00  | 80,471 (22.1%)  | 80,692 (22.1%)  | 0.00  |
| Osteoporosis without fractures                     | 19,070 (3.7%)   | 64,766 (6.5%)   | 0.13  | 15,212 (4.2%)   | 15,296 (4.2%)   | 0.00  |
| Fractures                                          | 8,657 (1.7%)    | 17,850 (1.8%)   | 0.01  | 6,041 (1.7%)    | 6,002 (1.6%)    | -0.01 |
| Falls                                              | 19,870 (3.8%)   | 42,610 (4.3%)   | 0.03  | 13,835 (3.8%)   | 13,733 (3.8%)   | 0.00  |
| NASH/NAFLD                                         | 34,021 (6.6%)   | 44,533 (4.5%)   | -0.09 | 21,397 (5.9%)   | 21,558 (5.9%)   | 0.00  |
| Liver disease                                      | 12,974 (2.5%)   | 31,519 (3.2%)   | 0.04  | 9,424 (2.6%)    | 9,515 (2.6%)    | 0.00  |
| Depression                                         | 94,647 (18.2%)  | 137,194 (13.7%) | -0.12 | 59,404 (16.3%)  | 59,399 (16.3%)  | 0.00  |
| Anxiety and sleep disorders                        | 117,883 (22.7%) | 177,871 (17.8%) | -0.12 | 74,890 (20.5%)  | 74,941 (20.5%)  | 0.00  |
| Cancer                                             | 34,146 (6.6%)   | 100,703 (10.1%) | 0.13  | 26,446 (7.2%)   | 26,578 (7.3%)   | 0.00  |
| <b>Other medication use; n (%)</b>                 |                 |                 |       |                 |                 |       |
| No. of distinct medications; mean (sd)             | 13.44 (6.32)    | 12.32 (5.98)    | -0.18 | 12.90 (6.00)    | 12.90 (6.27)    | 0.00  |
| No. of distinct brand medications; mean (sd)       | 3.03 (1.90)     | 2.69 (1.89)     | -0.18 | 2.83 (1.84)     | 2.82 (1.88)     | -0.01 |
| ACE inhibitors or angiotensin II receptor blockers | 372,265 (71.7%) | 729,362 (73.0%) | 0.03  | 263,230 (72.1%) | 262,922 (72.1%) | 0.00  |
| Beta blockers                                      | 183,588 (35.4%) | 400,395 (40.1%) | 0.10  | 130,890 (35.9%) | 130,648 (35.8%) | 0.00  |
| Calcium channel blockers                           | 138,813 (26.7%) | 316,557 (31.7%) | 0.11  | 100,578 (27.6%) | 100,012 (27.4%) | 0.00  |
| Nitrates and other antianginal agents              | 30,551 (5.9%)   | 73,135 (7.3%)   | 0.06  | 21,742 (6.0%)   | 21,569 (5.9%)   | 0.00  |

|                                                                    |                 |                 |       |                 |                 |       |
|--------------------------------------------------------------------|-----------------|-----------------|-------|-----------------|-----------------|-------|
| Thiazide and thiazide-like diuretics                               | 79,057 (15.2%)  | 143,624 (14.4%) | -0.02 | 53,755 (14.7%)  | 53,560 (14.7%)  | 0.00  |
| Loop diuretics                                                     | 75,755 (14.6%)  | 156,904 (15.7%) | 0.03  | 51,757 (14.2%)  | 51,596 (14.1%)  | 0.00  |
| Mineralocorticoid receptor antagonists                             | 23,813 (4.6%)   | 38,051 (3.8%)   | -0.04 | 14,902 (4.1%)   | 14,821 (4.1%)   | 0.00  |
| Other potassium-sparing diuretics and antihypertensive medications | 25,873 (5.0%)   | 74,341 (7.4%)   | 0.10  | 20,345 (5.6%)   | 20,476 (5.6%)   | 0.00  |
| Digoxin                                                            | 5,666 (1.1%)    | 23,574 (2.4%)   | 0.10  | 4,608 (1.3%)    | 4,541 (1.2%)    | -0.01 |
| Antiarrhythmics                                                    | 7,528 (1.5%)    | 20,533 (2.1%)   | 0.05  | 5,540 (1.5%)    | 5,608 (1.5%)    | 0.00  |
| Anticoagulants                                                     | 35,756 (6.9%)   | 86,096 (8.6%)   | 0.06  | 25,522 (7.0%)   | 25,527 (7.0%)   | 0.00  |
| Antiplatelet agents                                                | 49,068 (9.5%)   | 115,231 (11.5%) | 0.07  | 35,038 (9.6%)   | 34,732 (9.5%)   | 0.00  |
| Statins                                                            | 365,978 (70.5%) | 714,515 (71.5%) | 0.02  | 257,353 (70.5%) | 257,159 (70.5%) | 0.00  |
| PCSK9 inhibitors and other-lipid lowering agents                   | 77,507 (14.9%)  | 155,487 (15.6%) | 0.02  | 54,908 (15.0%)  | 55,144 (15.1%)  | 0.00  |
| COPD & asthma medications                                          | 100,945 (19.4%) | 179,114 (17.9%) | -0.04 | 68,826 (18.9%)  | 69,000 (18.9%)  | 0.00  |
| Oral corticosteroids                                               | 100,234 (19.3%) | 172,835 (17.3%) | -0.05 | 67,764 (18.6%)  | 68,160 (18.7%)  | 0.00  |
| Antiosteoporosis agents                                            | 12,018 (2.3%)   | 46,253 (4.6%)   | 0.13  | 9,924 (2.7%)    | 9,788 (2.7%)    | 0.00  |
| NSAIDs                                                             | 149,766 (28.9%) | 257,025 (25.7%) | -0.07 | 101,878 (27.9%) | 102,350 (28.0%) | 0.00  |
| Opioids                                                            | 177,270 (34.2%) | 327,129 (32.7%) | -0.03 | 123,540 (33.9%) | 124,044 (34.0%) | 0.00  |
| Gabapentinoids                                                     | 95,194 (18.3%)  | 150,921 (15.1%) | -0.09 | 61,516 (16.9%)  | 61,566 (16.9%)  | 0.00  |
| Antibiotics targeting urinary tract infection                      | 111,102 (21.4%) | 237,242 (23.7%) | 0.06  | 80,012 (21.9%)  | 80,347 (22.0%)  | 0.00  |
| Antidepressants                                                    | 176,962 (34.1%) | 257,994 (25.8%) | -0.18 | 113,255 (31.0%) | 113,394 (31.1%) | 0.00  |
| Anxiolytics/hypnotics                                              | 46,834 (9.0%)   | 76,331 (7.6%)   | -0.05 | 30,547 (8.4%)   | 30,577 (8.4%)   | 0.00  |
| Benzodiazepines                                                    | 71,112 (13.7%)  | 130,799 (13.1%) | -0.02 | 48,970 (13.4%)  | 49,321 (13.5%)  | 0.00  |
| Antipsychotics                                                     | 16,302 (3.1%)   | 29,048 (2.9%)   | -0.01 | 10,496 (2.9%)   | 10,451 (2.9%)   | 0.00  |
| Antiparkinsonian medications                                       | 17,006 (3.3%)   | 28,987 (2.9%)   | -0.02 | 11,347 (3.1%)   | 11,422 (3.1%)   | 0.00  |
| Dementia medications                                               | 6,193 (1.2%)    | 33,586 (3.4%)   | 0.15  | 5,304 (1.5%)    | 5,195 (1.4%)    | -0.01 |
| Potassium binders                                                  | 470 (0.1%)      | 1,385 (0.1%)    | 0.00  | 364 (0.1%)      | 357 (0.1%)      | 0.00  |
| Potassium supplements                                              | 41,993 (8.1%)   | 92,042 (9.2%)   | 0.04  | 29,695 (8.1%)   | 29,744 (8.2%)   | 0.00  |
| Angiotensin receptor-neprilysin inhibitor                          | 1,958 (0.4%)    | 2,048 (0.2%)    | -0.04 | 1,098 (0.3%)    | 1,113 (0.3%)    | 0.00  |
| <b>Measures of healthcare utilization; n (%)</b>                   |                 |                 |       |                 |                 |       |
| Internist visit within prior 31-365 days; n (%)                    | 446,494 (86.0%) | 858,127 (85.8%) | -0.01 | 312,929 (85.8%) | 313,040 (85.8%) | 0.00  |
| Internist visit within prior 30 days; n (%)                        | 328,484 (63.3%) | 681,682 (68.2%) | 0.10  | 238,792 (65.4%) | 239,168 (65.5%) | 0.00  |
| No. of internist visits; mean (sd)                                 | 15.01 (19.87)   | 15.40 (19.51)   | 0.02  | 14.94 (19.41)   | 14.99 (19.59)   | 0.00  |
| Endocrinologist within prior 31-365 days; n (%)                    | 90,013 (17.3%)  | 91,156 (9.1%)   | -0.24 | 48,798 (13.4%)  | 48,023 (13.2%)  | -0.01 |
| Endocrinologist within prior 30 days; n (%)                        | 88,236 (17.0%)  | 78,552 (7.9%)   | -0.28 | 45,042 (12.3%)  | 43,983 (12.1%)  | -0.01 |
| No. of endocrinologist visits; mean (sd)                           | 1.77 (6.19)     | 0.89 (4.42)     | -0.16 | 1.35 (5.48)     | 1.32 (5.39)     | -0.01 |
| Cardiologist visit within prior 31-365 days; n (%)                 | 160,416 (30.9%) | 346,083 (34.6%) | 0.08  | 112,982 (31.0%) | 112,682 (30.9%) | 0.00  |
| Cardiologist visit within prior 30 days; n (%)                     | 42,323 (8.2%)   | 116,580 (11.7%) | 0.12  | 31,106 (8.5%)   | 31,045 (8.5%)   | 0.00  |
| No. of cardiologist visits; mean (sd)                              | 2.28 (6.04)     | 2.98 (7.34)     | 0.10  | 2.34 (6.27)     | 2.33 (6.14)     | 0.00  |
| Nephrologist within prior 31-365 days; n (%)                       | 26,693 (5.1%)   | 60,584 (6.1%)   | 0.04  | 19,099 (5.2%)   | 19,193 (5.3%)   | 0.00  |
| Nephrologist within prior 30 days; n (%)                           | 6,859 (1.3%)    | 22,627 (2.3%)   | 0.08  | 5,185 (1.4%)    | 5,312 (1.5%)    | 0.01  |
| No. of nephrologist visits; mean (sd)                              | 0.27 (2.04)     | 0.36 (2.55)     | 0.04  | 0.28 (2.13)     | 0.28 (2.13)     | 0.00  |
| No. of electrocardiograms; mean (sd)                               | 1.04 (2.06)     | 1.24 (2.29)     | 0.09  | 1.05 (2.09)     | 1.04 (1.97)     | 0.00  |
| No. of cardiac angiographies or echocardiographies; mean (sd)      | 0.59 (2.16)     | 0.64 (2.10)     | 0.02  | 0.57 (2.02)     | 0.57 (2.06)     | 0.00  |
| Cardiovascular stress test; n (%)                                  | 51,625 (9.9%)   | 107,068 (10.7%) | 0.03  | 36,794 (10.1%)  | 36,625 (10.0%)  | 0.00  |
| No. of HbA1c tests ordered; mean (sd)                              | 2.56 (1.48)     | 2.38 (1.42)     | -0.12 | 2.49 (1.44)     | 2.50 (1.45)     | 0.01  |
| No. of glucose test ordered; mean (sd)                             | 0.93 (4.46)     | 0.82 (3.22)     | -0.03 | 0.86 (3.98)     | 0.87 (3.94)     | 0.00  |
| No. of microalbuminuria tests ordered; mean (sd)                   | 0.96 (1.08)     | 0.87 (1.04)     | -0.08 | 0.93 (1.07)     | 0.94 (1.06)     | 0.01  |
| No. of metabolic or creatinine tests ordered; mean (sd)            | 2.83 (2.65)     | 2.99 (2.76)     | 0.06  | 2.81 (2.65)     | 2.82 (2.56)     | 0.00  |

|                                                    |                 |                 |       |                 |                 |       |
|----------------------------------------------------|-----------------|-----------------|-------|-----------------|-----------------|-------|
| No. of lipid tests ordered; mean (sd)              | 1.89 (1.71)     | 1.89 (1.69)     | 0.00  | 1.89 (1.73)     | 1.90 (1.69)     | 0.01  |
| No. of hospitalizations; mean (sd)                 | 0.13 (0.47)     | 0.20 (0.58)     | 0.13  | 0.13 (0.48)     | 0.13 (0.46)     | 0.00  |
| Hospitalization within prior 365 days; n (%)       | 29,416 (8.0%)   | 47,210 (9.6%)   | 0.06  | 18,142 (7.6%)   | 18,819 (7.9%)   | 0.01  |
| Hospitalization within prior 31-365 days; n (%)    | 26,275 (7.1%)   | 35,672 (7.3%)   | 0.01  | 15,746 (6.6%)   | 15,853 (6.6%)   | 0.00  |
| Hospitalization within prior 30 days; n (%)        | 3,843 (1.0%)    | 14,295 (2.9%)   | 0.14  | 2,959 (1.2%)    | 3,516 (1.5%)    | 0.03  |
| Length of stay within prior 365 days; mean (sd)    | 0.61 (3.07)     | 1.08 (4.88)     | 0.12  | 0.63 (3.29)     | 0.64 (2.91)     | 0.00  |
| Length of stay within prior 31-365 days; mean (sd) | 0.54 (2.91)     | 0.76 (4.09)     | 0.06  | 0.56 (3.10)     | 0.56 (2.76)     | 0.00  |
| Length of stay within prior 30 days; mean (sd)     | 0.06 (0.69)     | 0.32 (2.01)     | 0.17  | 0.08 (0.79)     | 0.08 (0.74)     | 0.00  |
| No. of emergency department visits; mean (sd)      | 0.44 (1.33)     | 0.59 (1.57)     | 0.10  | 0.46 (1.41)     | 0.46 (1.27)     | 0.00  |
| Vitamin D test order; n (%)                        | 155,639 (30.0%) | 287,735 (28.8%) | -0.03 | 107,797 (29.5%) | 105,404 (28.9%) | -0.01 |
| Serum potassium test order; n (%)                  | 14,086 (2.7%)   | 28,288 (2.8%)   | 0.01  | 9,808 (2.7%)    | 9,841 (2.7%)    | 0.00  |
| <b>Laboratory results<sup>§</sup>, mean (sd)</b>   |                 |                 |       |                 |                 |       |
| HbA1c, %                                           | 9.0 (2.5)       | 8.9 (2.4)       | -0.06 | 8.9 (2.5)       | 9.0 (2.4)       | 0.02  |
| Missing                                            | 412,305 (79.4%) | 869,652 (87.0%) | 0.20  | 301,189 (82.5%) | 298,079 (81.7%) | -0.02 |
| eGFR, ml/min/1.73m <sup>2</sup>                    | 79 (24)         | 76 (24)         | -0.13 | 79 (24)         | 79 (24)         | -0.02 |
| Missing                                            | 410,012 (79.0%) | 863,453 (86.4%) | 0.20  | 299,459 (82.1%) | 295,434 (81.0%) | -0.03 |
| Urinary albumin-to-creatinine ratio, mg/g          | 111 (459)       | 100 (488)       | -0.02 | 102 (431)       | 102 (493)       | 0.00  |
| Missing                                            | 468,353 (90.2%) | 939,833 (94.0%) | 0.14  | 335,335 (91.9%) | 333,231 (91.3%) | -0.02 |
| Total cholesterol, mg/dL                           | 187 (59)        | 186 (60)        | -0.02 | 186 (59)        | 188 (59)        | 0.02  |
| Missing                                            | 422,884 (81.5%) | 878,941 (87.9%) | 0.18  | 306,819 (84.1%) | 303,173 (83.1%) | -0.03 |
| LDL cholesterol, mg/dL                             | 104 (47)        | 104 (47)        | -0.01 | 104 (47)        | 105 (47)        | 0.03  |
| Missing                                            | 424,138 (81.7%) | 880,236 (88.0%) | 0.18  | 307,661 (84.3%) | 304,002 (83.3%) | -0.03 |
| HDL cholesterol, mg/dL                             | 48 (19)         | 48 (19)         | 0.02  | 48 (19)         | 48 (19)         | 0.02  |
| Missing                                            | 424,596 (81.8%) | 880,003 (88.0%) | 0.17  | 307,768 (84.3%) | 303,890 (83.3%) | -0.03 |
| Triglycerides, mg/dL                               | 211 (168)       | 200 (155)       | -0.07 | 209 (165)       | 207 (162)       | -0.01 |
| Missing                                            | 423,999 (81.7%) | 879,645 (88.0%) | 0.18  | 307,487 (84.3%) | 303,529 (83.2%) | -0.03 |
| Creatinine, mg/dL                                  | 1.01 (0.54)     | 1.04 (0.50)     | 0.06  | 1.01 (0.50)     | 1.01 (0.50)     | 0.00  |
| Missing                                            | 410,012 (79.0%) | 863,453 (86.4%) | 0.20  | 299,459 (82.1%) | 295,434 (81.0%) | -0.03 |
| Glucose, mg/dL                                     | 195 (100)       | 193 (94)        | -0.02 | 193 (97)        | 197 (98)        | 0.04  |
| Missing                                            | 412,712 (79.5%) | 867,721 (86.8%) | 0.20  | 301,153 (82.5%) | 297,347 (81.5%) | -0.03 |
| Potassium, mmol/L                                  | 4.4 (0.4)       | 4.4 (0.4)       | 0.03  | 4.4 (0.4)       | 4.4 (0.4)       | -0.03 |
| Missing                                            | 411,559 (79.3%) | 865,441 (86.6%) | 0.20  | 300,435 (82.3%) | 296,393 (81.2%) | -0.03 |

ACE = angiotensin-converting enzyme; CDM = Optum's de-identified Clinformatics® Data Mart Database; CKD = chronic kidney disease; COPD = chronic obstructive pulmonary disease; DPP-4i = dipeptidyl peptidase-4 inhibitor; eGFR = estimated glomerular filtration rate; GLP-1RA = glucagon-like peptide-1 receptor agonist; HbA1c = hemoglobin A1c; HDL = high-density lipoprotein; LDL = low-density lipoprotein; n = number of patients; NASH = non-alcoholic steatohepatitis; NAFLD = non-alcoholic fatty liver disease; No. = number of; NSAIDs = Nonsteroidal anti-inflammatory drug; PCSK9 = Proprotein convertase subtilisin/kexin type 9; SGLT2i = sodium-glucose cotransporter-2 inhibitor; sd = standard deviation; SMD = standardized mean difference.

‡ Only available in CDM and Medicare databases. Percentages are relative to sample size of CDM and Medicare databases so total adds up to 100%.

\* Northeast (Connecticut, Massachusetts, Maine, New Hampshire, New Jersey, New York, Pennsylvania, Rhode Island, Vermont); South (Alabama; Arkansas; Delaware; Florida; Georgia; Kentucky; Louisiana; Maryland; Mississippi; North Carolina; Oklahoma; South Carolina; Tennessee; Texas; Virginia; Washington, DC; West Virginia); Midwest (Illinois, Indiana, Iowa, Kansas, Michigan, Minnesota, Missouri, Nebraska, North Dakota, Ohio, South Dakota, Wisconsin); West (Alaska, Arizona, California, Colorado, Hawai'i, Idaho, Montana, New Mexico, Nevada, Oregon, Utah, Washington, Wyoming).

† Based on: Gagne JJ, Glynn RJ, Avorn J, Levin R, Schneeweiss S. A combined comorbidity score predicted mortality in elderly patients better than existing scores. *J Clin Epidemiol.* 2011;64(7):749-59.

‡ Based on: Kim DH, Schneeweiss S, Glynn RJ, Lipsitz LA, Rockwood K, Avorn J. Measuring Frailty in Medicare Data: Development and Validation of a Claims-Based Frailty Index. *J Gerontol A Biol Sci Med Sci.* 2018;73(7):980-7

§ Pooled across CDM and MarketScan databases

|| Calculated with the CKD-EPI 2021 creatinine-based equation

**Supplemental Table 5.** Full list of baseline characteristics in patients with type 2 diabetes, stratified by SGLT-2i vs. GLP-1RA initiation in the pooled cohort, before and after 1:1 propensity score matching.

| Covariates                                         | Before matching    |                      |          | After propensity score matching |                      |          |
|----------------------------------------------------|--------------------|----------------------|----------|---------------------------------|----------------------|----------|
|                                                    | Exposure - SGLT-2i | Comparator - GLP1-RA | St. Diff | Exposure - SGLT-2i              | Comparator - GLP1-RA | St. Diff |
| Number of patients                                 | 647,008            | 585,422              |          | 436,730                         | 436,730              |          |
| <b>Demographics</b>                                |                    |                      |          |                                 |                      |          |
| Age; mean (sd)                                     | 62.8 (9.5)         | 61.9 (9.7)           | -0.09    | 62.0 (9.6)                      | 62.1 (9.6)           | 0.01     |
| Male; n (%)                                        | 361,127 (55.8%)    | 270,247 (46.2%)      | -0.19    | 218,999 (50.1%)                 | 219,612 (50.3%)      | 0.00     |
| Female; n (%)                                      | 285,883 (44.2%)    | 315,178 (53.8%)      | 0.19     | 217,733 (49.9%)                 | 217,120 (49.7%)      | 0.00     |
| Race/ethnicity <sup>‡</sup> ; n (%)                |                    |                      |          |                                 |                      |          |
| White                                              | 284,965 (69.1%)    | 280,947 (72.4%)      | 0.08     | 202,025 (71.7%)                 | 201,210 (71.4%)      | 0.00     |
| Black                                              | 43,254 (10.5%)     | 45,023 (11.6%)       | 0.04     | 31,322 (11.1%)                  | 31,444 (11.2%)       | 0.00     |
| Asian                                              | 21,037 (5.1%)      | 9,475 (2.4%)         | -0.11    | 7,985 (2.8%)                    | 8,445 (3.0%)         | 0.01     |
| Hispanic                                           | 41,948 (10.2%)     | 35,256 (9.1%)        | -0.02    | 27,183 (9.7%)                   | 27,333 (9.7%)        | 0.00     |
| Other                                              | 21,027 (5.1%)      | 17,280 (4.5%)        | -0.01    | 13,169 (4.7%)                   | 13,252 (4.7%)        | 0.00     |
| Calendar time; n (%)                               |                    |                      |          |                                 |                      |          |
| 2013                                               | 16,448 (2.5%)      | 41,452 (7.1%)        | 0.22     | 16,174 (3.7%)                   | 17,202 (3.9%)        | 0.01     |
| 2014                                               | 72,057 (11.1%)     | 52,639 (9.0%)        | -0.07    | 44,856 (10.3%)                  | 44,556 (10.2%)       | 0.00     |
| 2015                                               | 94,784 (14.6%)     | 54,996 (9.4%)        | -0.16    | 48,503 (11.1%)                  | 49,220 (11.3%)       | 0.01     |
| 2016                                               | 79,767 (12.3%)     | 60,341 (10.3%)       | -0.06    | 49,719 (11.4%)                  | 49,742 (11.4%)       | 0.00     |
| 2017                                               | 84,214 (13.0%)     | 70,891 (12.1%)       | -0.03    | 55,667 (12.7%)                  | 55,453 (12.7%)       | 0.00     |
| 2018                                               | 78,099 (12.1%)     | 85,605 (14.6%)       | 0.07     | 60,067 (13.8%)                  | 59,458 (13.6%)       | -0.01    |
| 2019                                               | 108,212 (16.7%)    | 105,024 (17.9%)      | 0.03     | 77,601 (17.8%)                  | 77,032 (17.6%)       | -0.01    |
| 2020                                               | 57,464 (8.9%)      | 60,389 (10.3%)       | 0.05     | 44,387 (10.2%)                  | 44,241 (10.1%)       | 0.00     |
| 2021                                               | 42,651 (6.6%)      | 42,807 (7.3%)        | 0.03     | 31,065 (7.1%)                   | 31,131 (7.1%)        | 0.00     |
| 2022                                               | 13,312 (2.1%)      | 11,278 (1.9%)        | -0.01    | 8,691 (2.0%)                    | 8,695 (2.0%)         | 0.00     |
| Region <sup>*</sup> ; n (%)                        |                    |                      |          |                                 |                      |          |
| Northeast                                          | 100,166 (15.5%)    | 79,523 (13.6%)       | -0.05    | 61,287 (14.0%)                  | 61,836 (14.2%)       | 0.01     |
| South                                              | 320,161 (49.5%)    | 285,173 (48.7%)      | -0.02    | 216,051 (49.5%)                 | 215,733 (49.4%)      | 0.00     |
| Midwest                                            | 123,992 (19.2%)    | 128,419 (21.9%)      | 0.07     | 91,125 (20.9%)                  | 90,714 (20.8%)       | 0.00     |
| West                                               | 102,689 (15.9%)    | 92,307 (15.8%)       | 0.00     | 68,267 (15.6%)                  | 68,447 (15.7%)       | 0.00     |
| Medicare Advantage; n (%)                          | 3,850 (0.6%)       | 3,312 (0.6%)         | 0.00     | 2,508 (0.6%)                    | 2,472 (0.6%)         | 0.00     |
| Combined comorbidity score; mean (sd) <sup>‡</sup> | 1.1 (1.9)          | 1.4 (2.0)            | 0.15     | 1.2 (2.0)                       | 1.2 (1.9)            | 0.00     |
| Frailty score; mean (sd) <sup>†</sup>              | 0.16 (0.04)        | 0.17 (0.05)          | 0.22     | 0.16 (0.05)                     | 0.16 (0.05)          | 0.00     |
| Frailty score squared; mean (sd) <sup>†</sup>      | 0.03 (0.02)        | 0.03 (0.02)          | 0.00     | 0.03 (0.02)                     | 0.03 (0.02)          | 0.00     |
| Frailty score categories; n (%)                    |                    |                      |          |                                 |                      |          |
| 0.00 - 0.14                                        | 342,718 (53.0%)    | 270,738 (46.2%)      | -0.14    | 219,322 (50.2%)                 | 218,943 (50.1%)      | 0.00     |
| 0.15 - 0.24                                        | 271,388 (41.9%)    | 271,009 (46.3%)      | 0.09     | 192,003 (44.0%)                 | 192,296 (44.0%)      | 0.00     |
| >= 0.25                                            | 32,902 (5.1%)      | 43,675 (7.5%)        | 0.10     | 25,405 (5.8%)                   | 25,491 (5.8%)        | 0.00     |
| <b>Lifestyle factors; n (%)</b>                    |                    |                      |          |                                 |                      |          |
| Overweight                                         | 54,635 (8.4%)      | 41,608 (7.1%)        | -0.05    | 33,149 (7.6%)                   | 33,489 (7.7%)        | 0.00     |
| Obesity                                            | 220,298 (34.0%)    | 273,402 (46.7%)      | 0.26     | 181,823 (41.6%)                 | 180,173 (41.3%)      | -0.01    |
| Obese (BMI 30-35 kg/m <sup>2</sup> )               | 91,712 (14.2%)     | 97,951 (16.7%)       | 0.07     | 74,488 (17.1%)                  | 66,209 (15.2%)       | -0.05    |
| Severe obese (BMI>35 kg/m <sup>2</sup> )           | 81,211 (12.6%)     | 127,023 (21.7%)      | 0.24     | 70,359 (16.1%)                  | 79,314 (18.2%)       | 0.06     |
| Smoking                                            | 108,482 (16.8%)    | 111,812 (19.1%)      | 0.06     | 77,906 (17.8%)                  | 77,891 (17.8%)       | 0.00     |



|                                                                    |                 |                 |       |                 |                 |       |
|--------------------------------------------------------------------|-----------------|-----------------|-------|-----------------|-----------------|-------|
| Alcohol abuse or dependence                                        | 6,264 (1.0%)    | 5,325 (0.9%)    | -0.01 | 4,037 (0.9%)    | 4,079 (0.9%)    | 0.00  |
| Drug abuse or dependence                                           | 9,744 (1.5%)    | 11,502 (2.0%)   | 0.04  | 7,456 (1.7%)    | 7,503 (1.7%)    | 0.00  |
| <b>Diabetes-related conditions; n (%)</b>                          |                 |                 |       |                 |                 |       |
| Diabetic nephropathy                                               | 76,486 (11.8%)  | 95,570 (16.3%)  | 0.13  | 57,905 (13.3%)  | 58,320 (13.4%)  | 0.00  |
| Diabetic retinopathy                                               | 60,924 (9.4%)   | 64,201 (11.0%)  | 0.05  | 42,897 (9.8%)   | 43,186 (9.9%)   | 0.00  |
| Diabetes with other ophthalmic manifestations                      | 47,797 (7.4%)   | 43,138 (7.4%)   | 0.00  | 30,844 (7.1%)   | 31,007 (7.1%)   | 0.00  |
| Diabetic neuropathy                                                | 124,118 (19.2%) | 138,328 (23.6%) | 0.11  | 91,832 (21.0%)  | 92,506 (21.2%)  | 0.00  |
| Diabetes with peripheral circulatory disorders                     | 9,919 (1.5%)    | 9,127 (1.6%)    | 0.01  | 6,262 (1.4%)    | 6,388 (1.5%)    | 0.01  |
| Diabetic foot                                                      | 12,730 (2.0%)   | 15,903 (2.7%)   | 0.05  | 9,768 (2.2%)    | 9,899 (2.3%)    | 0.01  |
| Infection of lower extremities (cellulitis or osteomyelitis)       | 25,037 (3.9%)   | 27,891 (4.8%)   | 0.04  | 18,507 (4.2%)   | 18,546 (4.2%)   | 0.00  |
| Lower-limb amputations                                             | 2,462 (0.4%)    | 3,510 (0.6%)    | 0.03  | 1,969 (0.5%)    | 1,991 (0.5%)    | 0.00  |
| Erectile Dysfunction                                               | 32,098 (5.0%)   | 25,816 (4.4%)   | -0.03 | 20,317 (4.7%)   | 20,530 (4.7%)   | 0.00  |
| Hypoglycemia                                                       | 65,691 (10.2%)  | 67,673 (11.6%)  | 0.04  | 46,861 (10.7%)  | 47,085 (10.8%)  | 0.00  |
| Hyperglycemia                                                      | 247,710 (38.3%) | 256,523 (43.8%) | 0.11  | 182,640 (41.8%) | 182,071 (41.7%) | 0.00  |
| Diabetic ketoacidosis                                              | 1,508 (0.2%)    | 1,743 (0.3%)    | 0.02  | 1,086 (0.2%)    | 1,111 (0.3%)    | 0.02  |
| Hyperosmolar hyperglycemic nonketotic syndrome                     | 4,746 (0.7%)    | 5,044 (0.9%)    | 0.02  | 3,417 (0.8%)    | 3,428 (0.8%)    | 0.00  |
| Diabetes with other complications                                  | 53,733 (8.3%)   | 57,932 (9.9%)   | 0.06  | 39,233 (9.0%)   | 39,460 (9.0%)   | 0.00  |
| Diabetes mellitus without mention of complications                 | 586,301 (90.6%) | 526,669 (90.0%) | -0.02 | 392,721 (89.9%) | 392,854 (90.0%) | 0.00  |
| <b>Diabetes treatment; n (%)</b>                                   |                 |                 |       |                 |                 |       |
| Number of anti-DM medications on day of entry to cohort; mean (sd) | 2.44 (0.94)     | 2.34 (0.95)     | -0.11 | 2.37 (0.94)     | 2.37 (0.96)     | 0.00  |
| Diabetes drugs on day of cohort entry                              |                 |                 |       |                 |                 |       |
| Metformin                                                          | 528,334 (81.7%) | 432,328 (73.8%) | -0.19 | 342,059 (78.3%) | 341,792 (78.3%) | 0.00  |
| Sulfonylureas                                                      | 263,696 (40.8%) | 226,188 (38.6%) | -0.04 | 173,718 (39.8%) | 173,516 (39.7%) | 0.00  |
| Thiazolidinediones                                                 | 60,788 (9.4%)   | 52,741 (9.0%)   | -0.01 | 40,368 (9.2%)   | 40,288 (9.2%)   | 0.00  |
| DPP4i                                                              | 228,114 (35.3%) | 154,072 (26.3%) | -0.20 | 126,648 (29.0%) | 127,553 (29.2%) | 0.00  |
| Insulin                                                            | 127,848 (19.8%) | 201,659 (34.4%) | 0.33  | 114,963 (26.3%) | 115,746 (26.5%) | 0.00  |
| No use of anti-DM medications in prior 365 days                    | 47,098 (7.3%)   | 46,545 (8.0%)   | 0.03  | 34,615 (7.9%)   | 33,849 (7.8%)   | 0.00  |
| Past use of metformin                                              | 424,689 (65.6%) | 330,710 (56.5%) | -0.19 | 268,298 (61.4%) | 267,044 (61.1%) | -0.01 |
| Past use of sulfonylureas                                          | 197,970 (30.6%) | 165,816 (28.3%) | -0.05 | 126,714 (29.0%) | 130,573 (29.9%) | 0.02  |
| Past use of thiazolidinediones                                     | 41,489 (6.4%)   | 35,794 (6.1%)   | -0.01 | 26,480 (6.1%)   | 28,210 (6.5%)   | 0.02  |
| Past use of DPP4i                                                  | 167,441 (25.9%) | 94,638 (16.2%)  | -0.24 | 89,633 (20.5%)  | 80,170 (18.4%)  | -0.05 |
| Past use of insulin                                                | 93,124 (14.4%)  | 153,288 (26.2%) | 0.30  | 83,277 (19.1%)  | 89,051 (20.4%)  | 0.03  |
| Long term use of insulin                                           | 65,942 (10.2%)  | 114,737 (19.6%) | 0.27  | 60,185 (13.8%)  | 61,063 (14.0%)  | 0.01  |
| Miscellaneous anti-DM medications                                  | 14,099 (2.2%)   | 12,707 (2.2%)   | 0.00  | 9,185 (2.1%)    | 9,188 (2.1%)    | 0.00  |
| <b>Comorbid conditions; n (%)</b>                                  |                 |                 |       |                 |                 |       |
| Hypertension                                                       | 511,813 (79.1%) | 468,154 (80.0%) | 0.02  | 345,667 (79.1%) | 346,112 (79.3%) | 0.00  |
| Hyperlipidemia                                                     | 516,022 (79.8%) | 459,030 (78.4%) | -0.03 | 342,881 (78.5%) | 343,544 (78.7%) | 0.00  |
| Cardiovascular disease                                             | 202,546 (31.3%) | 181,612 (31.0%) | -0.01 | 131,728 (30.2%) | 131,703 (30.2%) | 0.00  |
| Hypokalemia                                                        | 13,340 (2.1%)   | 14,577 (2.5%)   | 0.03  | 9,614 (2.2%)    | 9,614 (2.2%)    | 0.00  |
| Hyperkalemia                                                       | 6,997 (1.1%)    | 8,529 (1.5%)    | 0.04  | 5,099 (1.2%)    | 5,209 (1.2%)    | 0.00  |
| Acute myocardial infarction                                        | 12,414 (1.9%)   | 9,327 (1.6%)    | -0.02 | 7,064 (1.6%)    | 7,163 (1.6%)    | 0.00  |
| Myocardial infarction sequelae                                     | 23,464 (3.6%)   | 20,538 (3.5%)   | -0.01 | 14,837 (3.4%)   | 14,822 (3.4%)   | 0.00  |
| Stable angina                                                      | 32,883 (5.1%)   | 27,309 (4.7%)   | -0.02 | 20,298 (4.6%)   | 20,394 (4.7%)   | 0.00  |
| Unstable angina                                                    | 14,605 (2.3%)   | 12,214 (2.1%)   | -0.01 | 9,056 (2.1%)    | 9,013 (2.1%)    | 0.00  |
| Coronary atherosclerosis                                           | 136,649 (21.1%) | 117,352 (20.0%) | -0.03 | 86,149 (19.7%)  | 86,497 (19.8%)  | 0.00  |
| Coronary procedure                                                 | 12,505 (1.9%)   | 8,675 (1.5%)    | -0.03 | 6,903 (1.6%)    | 6,949 (1.6%)    | 0.00  |

|                                                    |                 |                 |       |                 |                 |      |
|----------------------------------------------------|-----------------|-----------------|-------|-----------------|-----------------|------|
| History of coronary procedure                      | 45,911 (7.1%)   | 39,217 (6.7%)   | -0.02 | 28,648 (6.6%)   | 28,645 (6.6%)   | 0.00 |
| Congestive heart failure                           | 52,505 (8.1%)   | 51,635 (8.8%)   | 0.03  | 34,535 (7.9%)   | 34,862 (8.0%)   | 0.00 |
| Cardiomyopathy                                     | 21,310 (3.3%)   | 17,380 (3.0%)   | -0.02 | 12,753 (2.9%)   | 12,828 (2.9%)   | 0.00 |
| Atrial fibrillation                                | 47,840 (7.4%)   | 43,861 (7.5%)   | 0.00  | 31,381 (7.2%)   | 31,448 (7.2%)   | 0.00 |
| Cardiac conduction disorders                       | 24,996 (3.9%)   | 22,920 (3.9%)   | 0.00  | 16,315 (3.7%)   | 16,296 (3.7%)   | 0.00 |
| Other cardiac dysrhythmia                          | 63,185 (9.8%)   | 59,547 (10.2%)  | 0.01  | 42,199 (9.7%)   | 42,299 (9.7%)   | 0.00 |
| Valve disorders                                    | 55,963 (8.6%)   | 48,638 (8.3%)   | -0.01 | 35,434 (8.1%)   | 35,467 (8.1%)   | 0.00 |
| Other cardiovascular disease                       | 68,364 (10.6%)  | 65,332 (11.2%)  | 0.02  | 45,869 (10.5%)  | 45,973 (10.5%)  | 0.00 |
| Ischemic stroke                                    | 45,721 (7.1%)   | 40,703 (7.0%)   | 0.00  | 29,450 (6.7%)   | 29,512 (6.8%)   | 0.00 |
| Transient ischemic attack                          | 10,679 (1.7%)   | 9,735 (1.7%)    | 0.00  | 7,084 (1.6%)    | 7,031 (1.6%)    | 0.00 |
| Other cerebrovascular conditions                   | 28,953 (4.5%)   | 28,987 (5.0%)   | 0.02  | 19,890 (4.6%)   | 19,905 (4.6%)   | 0.00 |
| Peripheral arterial disease                        | 53,151 (8.2%)   | 50,813 (8.7%)   | 0.02  | 35,457 (8.1%)   | 35,803 (8.2%)   | 0.00 |
| Acute Kidney Injury                                | 15,648 (2.4%)   | 22,261 (3.8%)   | 0.08  | 12,198 (2.8%)   | 12,370 (2.8%)   | 0.00 |
| CKD                                                | 65,778 (10.2%)  | 94,599 (16.2%)  | 0.18  | 52,839 (12.1%)  | 53,521 (12.3%)  | 0.01 |
| CKD Stage 1-2                                      | 22,235 (3.4%)   | 23,061 (3.9%)   | 0.03  | 15,712 (3.6%)   | 15,798 (3.6%)   | 0.00 |
| CKD Stage 3-4                                      | 38,413 (5.9%)   | 68,029 (11.6%)  | 0.20  | 33,695 (7.7%)   | 34,374 (7.9%)   | 0.01 |
| CKD Stage 3                                        | 36,558 (5.7%)   | 64,806 (11.1%)  | 0.20  | 32,183 (7.4%)   | 32,875 (7.5%)   | 0.00 |
| CKD Stage 4                                        | 3,747 (0.6%)    | 10,568 (1.8%)   | 0.11  | 3,364 (0.8%)    | 3,610 (0.8%)    | 0.00 |
| CKD unspecified                                    | 20,955 (3.2%)   | 33,423 (5.7%)   | 0.12  | 17,172 (3.9%)   | 17,468 (4.0%)   | 0.01 |
| Hypertensive nephropathy                           | 35,305 (5.5%)   | 50,733 (8.7%)   | 0.12  | 27,469 (6.3%)   | 27,845 (6.4%)   | 0.00 |
| Miscellaneous kidney disease                       | 43,703 (6.8%)   | 52,132 (8.9%)   | 0.08  | 32,661 (7.5%)   | 32,671 (7.5%)   | 0.00 |
| Urinary tract infection                            | 67,324 (10.4%)  | 77,377 (13.2%)  | 0.09  | 50,605 (11.6%)  | 50,746 (11.6%)  | 0.00 |
| Kidney and urinary stone                           | 25,666 (4.0%)   | 26,256 (4.5%)   | 0.02  | 18,267 (4.2%)   | 18,248 (4.2%)   | 0.00 |
| Disorders of electrolyte                           | 32,694 (5.1%)   | 35,626 (6.1%)   | 0.04  | 23,157 (5.3%)   | 23,383 (5.4%)   | 0.00 |
| Disorders of fluid balance                         | 17,125 (2.6%)   | 19,126 (3.3%)   | 0.04  | 12,234 (2.8%)   | 12,398 (2.8%)   | 0.00 |
| Edema                                              | 53,604 (8.3%)   | 64,296 (11.0%)  | 0.09  | 40,721 (9.3%)   | 40,777 (9.3%)   | 0.00 |
| COPD                                               | 53,063 (8.2%)   | 55,341 (9.5%)   | 0.05  | 37,492 (8.6%)   | 37,682 (8.6%)   | 0.00 |
| Asthma                                             | 48,642 (7.5%)   | 56,513 (9.7%)   | 0.08  | 37,284 (8.5%)   | 37,133 (8.5%)   | 0.00 |
| Obstructive sleep apnea                            | 104,821 (16.2%) | 130,314 (22.3%) | 0.16  | 84,713 (19.4%)  | 84,271 (19.3%)  | 0.00 |
| Pneumonia                                          | 21,543 (3.3%)   | 23,467 (4.0%)   | 0.04  | 15,707 (3.6%)   | 15,693 (3.6%)   | 0.00 |
| Osteoarthritis                                     | 126,962 (19.6%) | 134,769 (23.0%) | 0.08  | 92,977 (21.3%)  | 93,031 (21.3%)  | 0.00 |
| Osteoporosis without fractures                     | 27,077 (4.2%)   | 24,415 (4.2%)   | 0.00  | 17,630 (4.0%)   | 17,756 (4.1%)   | 0.01 |
| Fractures                                          | 8,956 (1.4%)    | 9,987 (1.7%)    | 0.02  | 6,712 (1.5%)    | 6,633 (1.5%)    | 0.00 |
| Falls                                              | 20,672 (3.2%)   | 23,184 (4.0%)   | 0.04  | 15,375 (3.5%)   | 15,296 (3.5%)   | 0.00 |
| NASH/NAFLD                                         | 36,166 (5.6%)   | 37,816 (6.5%)   | 0.04  | 26,937 (6.2%)   | 26,870 (6.2%)   | 0.00 |
| Liver disease                                      | 17,581 (2.7%)   | 15,259 (2.6%)   | -0.01 | 11,329 (2.6%)   | 11,401 (2.6%)   | 0.00 |
| Depression                                         | 82,686 (12.8%)  | 105,328 (18.0%) | 0.14  | 67,148 (15.4%)  | 67,119 (15.4%)  | 0.00 |
| Anxiety and sleep disorders                        | 113,756 (17.6%) | 129,979 (22.2%) | 0.12  | 87,632 (20.1%)  | 87,181 (20.0%)  | 0.00 |
| Cancer                                             | 46,655 (7.2%)   | 42,093 (7.2%)   | 0.00  | 30,697 (7.0%)   | 30,774 (7.0%)   | 0.00 |
| <b>Other medication use; n (%)</b>                 |                 |                 |       |                 |                 |      |
| No. of distinct medications; mean (sd)             | 12.33 (5.91)    | 13.70 (6.35)    | 0.22  | 12.92 (6.15)    | 12.94 (5.95)    | 0.00 |
| No. of distinct brand medications; mean (sd)       | 2.93 (1.91)     | 3.18 (2.01)     | 0.13  | 2.98 (1.94)     | 3.00 (1.92)     | 0.01 |
| ACE inhibitors or angiotensin II receptor blockers | 476,087 (73.6%) | 427,710 (73.1%) | -0.01 | 319,598 (73.2%) | 319,716 (73.2%) | 0.00 |
| Beta blockers                                      | 231,849 (35.8%) | 216,189 (36.9%) | 0.02  | 155,722 (35.7%) | 156,071 (35.7%) | 0.00 |
| Calcium channel blockers                           | 178,825 (27.6%) | 164,844 (28.2%) | 0.01  | 120,189 (27.5%) | 120,647 (27.6%) | 0.00 |
| Nitrates and other antianginal agents              | 39,777 (6.1%)   | 36,413 (6.2%)   | 0.00  | 25,640 (5.9%)   | 25,874 (5.9%)   | 0.00 |

|                                                                    |                 |                 |       |                 |                 |      |
|--------------------------------------------------------------------|-----------------|-----------------|-------|-----------------|-----------------|------|
| Thiazide and thiazide-like diuretics                               | 85,723 (13.2%)  | 91,055 (15.6%)  | 0.07  | 63,538 (14.5%)  | 63,547 (14.6%)  | 0.00 |
| Loop diuretics                                                     | 74,739 (11.6%)  | 90,799 (15.5%)  | 0.11  | 56,323 (12.9%)  | 56,592 (13.0%)  | 0.00 |
| Mineralocorticoid receptor antagonists                             | 24,687 (3.8%)   | 26,886 (4.6%)   | 0.04  | 17,491 (4.0%)   | 17,622 (4.0%)   | 0.00 |
| Other potassium-sparing diuretics and antihypertensive medications | 29,652 (4.6%)   | 33,014 (5.6%)   | 0.05  | 21,795 (5.0%)   | 21,720 (5.0%)   | 0.00 |
| Digoxin                                                            | 9,269 (1.4%)    | 7,367 (1.3%)    | -0.01 | 5,535 (1.3%)    | 5,557 (1.3%)    | 0.00 |
| Antiarrhythmics                                                    | 9,787 (1.5%)    | 9,024 (1.5%)    | 0.00  | 6,420 (1.5%)    | 6,424 (1.5%)    | 0.00 |
| Anticoagulants                                                     | 43,869 (6.8%)   | 42,486 (7.3%)   | 0.02  | 29,630 (6.8%)   | 29,736 (6.8%)   | 0.00 |
| Antiplatelet agents                                                | 68,462 (10.6%)  | 57,394 (9.8%)   | -0.03 | 42,626 (9.8%)   | 42,905 (9.8%)   | 0.00 |
| Statins                                                            | 474,311 (73.3%) | 419,304 (71.6%) | -0.04 | 314,054 (71.9%) | 314,785 (72.1%) | 0.00 |
| PCSK9 inhibitors and other-lipid lowering agents                   | 107,009 (16.5%) | 91,916 (15.7%)  | -0.02 | 68,532 (15.7%)  | 68,911 (15.8%)  | 0.00 |
| COPD & asthma medications                                          | 108,574 (16.8%) | 117,076 (20.0%) | 0.08  | 80,363 (18.4%)  | 80,249 (18.4%)  | 0.00 |
| Oral corticosteroids                                               | 107,933 (16.7%) | 111,454 (19.0%) | 0.06  | 78,588 (18.0%)  | 78,321 (17.9%)  | 0.00 |
| Antiosteoporosis agents                                            | 19,427 (3.0%)   | 15,950 (2.7%)   | -0.02 | 11,875 (2.7%)   | 11,894 (2.7%)   | 0.00 |
| NSAIDs                                                             | 175,519 (27.1%) | 166,877 (28.5%) | 0.03  | 122,580 (28.1%) | 122,366 (28.0%) | 0.00 |
| Opioids                                                            | 192,557 (29.8%) | 202,180 (34.5%) | 0.10  | 139,972 (32.1%) | 140,140 (32.1%) | 0.00 |
| Gabapentinoids                                                     | 92,583 (14.3%)  | 107,904 (18.4%) | 0.11  | 70,857 (16.2%)  | 70,894 (16.2%)  | 0.00 |
| Antibiotics targeting urinary tract infection                      | 125,701 (19.4%) | 129,852 (22.2%) | 0.07  | 90,293 (20.7%)  | 90,232 (20.7%)  | 0.00 |
| Antidepressants                                                    | 164,456 (25.4%) | 197,373 (33.7%) | 0.18  | 130,800 (29.9%) | 130,342 (29.8%) | 0.00 |
| Anxiolytics/hypnotics                                              | 47,951 (7.4%)   | 52,853 (9.0%)   | 0.06  | 35,538 (8.1%)   | 35,579 (8.1%)   | 0.00 |
| Benzodiazepines                                                    | 75,571 (11.7%)  | 80,288 (13.7%)  | 0.06  | 55,779 (12.8%)  | 55,825 (12.8%)  | 0.00 |
| Antipsychotics                                                     | 14,843 (2.3%)   | 18,290 (3.1%)   | 0.05  | 11,710 (2.7%)   | 11,626 (2.7%)   | 0.00 |
| Antiparkinsonian medications                                       | 16,364 (2.5%)   | 19,728 (3.4%)   | 0.05  | 12,620 (2.9%)   | 12,786 (2.9%)   | 0.00 |
| Dementia medications                                               | 9,670 (1.5%)    | 8,846 (1.5%)    | 0.00  | 6,271 (1.4%)    | 6,252 (1.4%)    | 0.00 |
| Potassium binders                                                  | 454 (0.1%)      | 706 (0.1%)      | 0.00  | 358 (0.1%)      | 353 (0.1%)      | 0.00 |
| Potassium supplements                                              | 44,764 (6.9%)   | 49,433 (8.4%)   | 0.06  | 33,029 (7.6%)   | 33,069 (7.6%)   | 0.00 |
| Angiotensin receptor-neprilysin inhibitor                          | 4,888 (0.8%)    | 1,877 (0.3%)    | -0.07 | 1,592 (0.4%)    | 1,678 (0.4%)    | 0.00 |
| <b>Measures of healthcare utilization; n (%)</b>                   |                 |                 |       |                 |                 |      |
| Internist visit within prior 31-365 days; n (%)                    | 558,081 (86.3%) | 506,888 (86.6%) | 0.01  | 376,195 (86.1%) | 376,504 (86.2%) | 0.00 |
| Internist visit within prior 30 days; n (%)                        | 432,905 (66.9%) | 375,654 (64.2%) | -0.06 | 286,238 (65.5%) | 286,265 (65.5%) | 0.00 |
| No. of internist visits; mean (sd)                                 | 14.86 (19.24)   | 15.32 (20.02)   | 0.02  | 14.94 (19.18)   | 14.96 (19.47)   | 0.00 |
| Endocrinologist within prior 31-365 days; n (%)                    | 80,537 (12.4%)  | 97,475 (16.7%)  | 0.12  | 62,230 (14.2%)  | 62,779 (14.4%)  | 0.01 |
| Endocrinologist within prior 30 days; n (%)                        | 73,802 (11.4%)  | 97,592 (16.7%)  | 0.15  | 59,815 (13.7%)  | 60,318 (13.8%)  | 0.00 |
| No. of endocrinologist visits; mean (sd)                           | 1.27 (5.32)     | 1.68 (5.93)     | 0.07  | 1.45 (5.51)     | 1.46 (5.69)     | 0.00 |
| Cardiologist visit within prior 31-365 days; n (%)                 | 197,957 (30.6%) | 187,685 (32.1%) | 0.03  | 133,403 (30.5%) | 133,884 (30.7%) | 0.00 |
| Cardiologist visit within prior 30 days; n (%)                     | 63,320 (9.8%)   | 49,484 (8.5%)   | -0.05 | 37,711 (8.6%)   | 37,854 (8.7%)   | 0.00 |
| No. of cardiologist visits; mean (sd)                              | 2.46 (6.48)     | 2.40 (6.33)     | -0.01 | 2.31 (6.03)     | 2.32 (6.29)     | 0.00 |
| Nephrologist within prior 31-365 days; n (%)                       | 21,440 (3.3%)   | 36,655 (6.3%)   | 0.14  | 17,705 (4.1%)   | 18,135 (4.2%)   | 0.01 |
| Nephrologist within prior 30 days; n (%)                           | 6,899 (1.1%)    | 9,634 (1.6%)    | 0.04  | 5,070 (1.2%)    | 5,245 (1.2%)    | 0.00 |
| No. of nephrologist visits; mean (sd)                              | 0.17 (2.04)     | 0.33 (2.36)     | 0.07  | 0.21 (2.30)     | 0.22 (1.90)     | 0.00 |
| No. of electrocardiograms; mean (sd)                               | 1.04 (2.06)     | 1.07 (2.07)     | 0.01  | 1.02 (1.98)     | 1.03 (2.06)     | 0.00 |
| No. of cardiac angiographies or echocardiographies; mean (sd)      | 0.64 (2.47)     | 0.59 (2.07)     | -0.02 | 0.58 (2.15)     | 0.58 (2.12)     | 0.00 |
| Cardiovascular stress test; n (%)                                  | 66,168 (10.2%)  | 60,364 (10.3%)  | 0.00  | 43,690 (10.0%)  | 43,952 (10.1%)  | 0.00 |
| No. of HbA1c tests ordered; mean (sd)                              | 2.52 (1.44)     | 2.59 (1.48)     | 0.05  | 2.54 (1.45)     | 2.55 (1.46)     | 0.01 |
| No. of glucose test ordered; mean (sd)                             | 0.80 (1.97)     | 0.96 (4.75)     | 0.04  | 0.83 (1.97)     | 0.84 (2.44)     | 0.00 |
| No. of microalbuminuria tests ordered; mean (sd)                   | 0.95 (1.06)     | 0.98 (1.10)     | 0.03  | 0.95 (1.06)     | 0.95 (1.07)     | 0.00 |
| No. of metabolic or creatinine tests ordered; mean (sd)            | 2.72 (2.47)     | 2.91 (2.68)     | 0.07  | 2.76 (2.48)     | 2.77 (2.57)     | 0.00 |

|                                                    |                 |                 |       |                 |                 |       |
|----------------------------------------------------|-----------------|-----------------|-------|-----------------|-----------------|-------|
| No. of lipid tests ordered; mean (sd)              | 1.98 (1.75)     | 1.91 (1.71)     | -0.04 | 1.93 (1.66)     | 1.94 (1.75)     | 0.01  |
| No. of hospitalizations; mean (sd)                 | 0.12 (0.44)     | 0.14 (0.48)     | 0.04  | 0.12 (0.44)     | 0.12 (0.45)     | 0.00  |
| Hospitalization within prior 365 days; n (%)       | 31,904 (7.4%)   | 31,351 (8.0%)   | 0.02  | 21,812 (7.4%)   | 21,698 (7.3%)   | 0.00  |
| Hospitalization within prior 31-365 days; n (%)    | 27,038 (6.2%)   | 28,089 (7.2%)   | 0.04  | 19,105 (6.5%)   | 19,098 (6.5%)   | 0.00  |
| Hospitalization within prior 30 days; n (%)        | 5,977 (1.4%)    | 3,998 (1.0%)    | -0.04 | 3,302 (1.1%)    | 3,157 (1.1%)    | 0.00  |
| Length of stay within prior 365 days; mean (sd)    | 0.55 (2.92)     | 0.63 (3.11)     | 0.03  | 0.56 (2.85)     | 0.56 (3.05)     | 0.00  |
| Length of stay within prior 31-365 days; mean (sd) | 0.46 (2.70)     | 0.57 (2.94)     | 0.04  | 0.49 (2.68)     | 0.50 (2.85)     | 0.00  |
| Length of stay within prior 30 days; mean (sd)     | 0.08 (0.82)     | 0.06 (0.70)     | -0.03 | 0.07 (0.71)     | 0.07 (0.73)     | 0.00  |
| No. of emergency department visits; mean (sd)      | 0.38 (1.19)     | 0.47 (1.37)     | 0.07  | 0.41 (1.23)     | 0.41 (1.27)     | 0.00  |
| Vitamin D test order; n (%)                        | 179,972 (27.8%) | 178,049 (30.4%) | 0.06  | 124,020 (28.4%) | 127,095 (29.1%) | 0.02  |
| Serum potassium test order; n (%)                  | 14,770 (2.3%)   | 16,511 (2.8%)   | 0.03  | 10,873 (2.5%)   | 10,923 (2.5%)   | 0.00  |
| <b>Laboratory results<sup>§</sup>, mean (sd)</b>   |                 |                 |       |                 |                 |       |
| HbA1c, %                                           | 9.0 (2.4)       | 9.0 (2.5)       | 0.02  | 9.0 (2.4)       | 9.0 (2.5)       | 0.00  |
| Missing                                            | 523,207 (80.9%) | 474,600 (81.1%) | 0.01  | 351,476 (80.5%) | 353,881 (81.0%) | 0.01  |
| eGFR, ml/min/1.73m <sup>2</sup>                    | 80 (23)         | 78 (25)         | -0.06 | 80 (23)         | 79 (24)         | -0.04 |
| Missing                                            | 520,397 (80.4%) | 471,859 (80.6%) | 0.01  | 349,175 (80.0%) | 352,314 (80.7%) | 0.02  |
| Urinary albumin-to-creatinine ratio, mg/g          | 98 (445)        | 116 (476)       | 0.04  | 104 (464)       | 105 (449)       | 0.00  |
| Missing                                            | 587,863 (90.9%) | 532,739 (91.0%) | 0.00  | 396,081 (90.7%) | 397,090 (90.9%) | 0.01  |
| Total cholesterol, mg/dL                           | 184 (59)        | 185 (59)        | 0.02  | 185 (60s)       | 184 (59)        | -0.02 |
| Missing                                            | 533,624 (82.5%) | 485,529 (82.9%) | 0.01  | 359,005 (82.2%) | 361,606 (82.8%) | 0.02  |
| LDL cholesterol, mg/dL                             | 102 (47)        | 103 (46)        | 0.01  | 103 (47)        | 103 (46)        | -0.02 |
| Missing                                            | 535,412 (82.8%) | 486,549 (83.1%) | 0.01  | 360,216 (82.5%) | 362,406 (83.0%) | 0.01  |
| HDL cholesterol, mg/dL                             | 48 (19)         | 48 (19)         | 0.01  | 48 (19)         | 48 (19)         | -0.01 |
| Missing                                            | 535,310 (82.7%) | 487,139 (83.2%) | 0.01  | 360,268 (82.5%) | 362,762 (83.1%) | 0.02  |
| Triglycerides, mg/dL                               | 208 (166)       | 208 (163)       | 0.00  | 210 (168)       | 208 (164)       | -0.01 |
| Missing                                            | 534,352 (82.6%) | 486,645 (83.1%) | 0.01  | 359,516 (82.3%) | 362,428 (83.0%) | 0.02  |
| Creatinine, mg/dL                                  | 1.00 (0.46)     | 1.02 (0.54)     | 0.04  | 0.99 (0.47)     | 1.01 (0.51)     | 0.04  |
| Missing                                            | 520,397 (80.4%) | 471,859 (80.6%) | 0.01  | 349,175 (80.0%) | 352,314 (80.7%) | 0.02  |
| Glucose, mg/dL                                     | 197 (94)        | 197 (99)        | 0.00  | 198 (95)        | 197 (98)        | -0.01 |
| Missing                                            | 523,801 (81.0%) | 474,907 (81.1%) | 0.00  | 351,494 (80.5%) | 354,502 (81.2%) | 0.02  |
| Potassium, mmol/L                                  | 4.4 (0.4)       | 4.4 (0.4)       | -0.03 | 4.4 (0.4)       | 4.4 (0.4)       | 0.03  |
| Missing                                            | 522,419 (80.7%) | 473,467 (80.9%) | 0.01  | 350,488 (80.3%) | 353,534 (81.0%) | 0.02  |

ACE = angiotensin-converting enzyme; CDM = Optum's de-identified Clinformatics® Data Mart Database; CKD = chronic kidney disease; COPD = chronic obstructive pulmonary disease; DPP-4i = dipeptidyl peptidase-4 inhibitor; eGFR = estimated glomerular filtration rate; GLP-1RA = glucagon-like peptide-1 receptor agonist; HbA1c = hemoglobin A1c; HDL = high-density lipoprotein; LDL = low-density lipoprotein; n = number of patients; NASH = non-alcoholic steatohepatitis; NAFLD = non-alcoholic fatty liver disease; No. = number of; NSAIDs = Nonsteroidal anti-inflammatory drug; PCSK9 = Proprotein convertase subtilisin/kexin type 9; SGLT2i = sodium-glucose cotransporter-2 inhibitor; sd = standard deviation; SMD = standardized mean difference.

‡ Only available in CDM and Medicare databases. Percentages are relative to sample size of CDM and Medicare databases so total adds up to 100%.

\* Northeast (Connecticut, Massachusetts, Maine, New Hampshire, New Jersey, New York, Pennsylvania, Rhode Island, Vermont); South (Alabama; Arkansas; Delaware; Florida; Georgia; Kentucky; Louisiana; Maryland; Mississippi; North Carolina; Oklahoma; South Carolina; Tennessee; Texas; Virginia; Washington, DC; West Virginia); Midwest (Illinois, Indiana, Iowa, Kansas, Michigan, Minnesota, Missouri, Nebraska, North Dakota, Ohio, South Dakota, Wisconsin); West (Alaska, Arizona, California, Colorado, Hawai'i, Idaho, Montana, New Mexico, Nevada, Oregon, Utah, Washington, Wyoming).

† Based on: Gagne JJ, Glynn RJ, Avorn J, Levin R, Schneeweiss S. A combined comorbidity score predicted mortality in elderly patients better than existing scores. *J Clin Epidemiol.* 2011;64(7):749-59.

‡ Based on: Kim DH, Schneeweiss S, Glynn RJ, Lipsitz LA, Rockwood K, Avorn J. Measuring Frailty in Medicare Data: Development and Validation of a Claims-Based Frailty Index. *J Gerontol A Biol Sci Med Sci.* 2018;73(7):980-7

§ Pooled across CDM and MarketScan databases

|| Calculated with the CKD-EPI 2021 creatinine-based equation

**Supplemental Table 6.** Individual SGLT-2i, GLP-1RA and DPP-4i agents included in the analysis after 1:1 propensity score matching.

|               | SGLT-2i vs. DPP-4i |                  | GLP-1RA vs. DPP-4i |                 | SGLT-2i vs. GLP-1RA |                 |
|---------------|--------------------|------------------|--------------------|-----------------|---------------------|-----------------|
|               | SGLT-2i            | DPP-4i           | GLP-1RA            | DPP-4i          | SGLT-2i             | GLP-1RA         |
| Canagliflozin | 150,685 (38.7%)    | -                | -                  | -               | 152,915 (35.0%)     | -               |
| Dapagliflozin | 79,234 (20.3%)     | -                | -                  | -               | 85,008 (19.5%)      | -               |
| Empagliflozin | 158,651 (40.7%)    | -                | -                  | -               | 197,312 (45.2%)     | -               |
| Ertugliflozin | 884 (0.2%)         | -                | -                  | -               | 1,495 (0.3%)        | -               |
| Liraglutide   | -                  | -                | 135,798 (37.2%)    | -               | -                   | 149,928 (34.3%) |
| Exenatide     | -                  | -                | 57,330 (15.7%)     | -               | -                   | 66,151 (15.1%)  |
| Dulaglutide   | -                  | -                | 116,011 (31.8%)    | -               | -                   | 144,558 (33.1%) |
| Albiglutide   | -                  | -                | 6,724 (1.8%)       | -               | -                   | 7,931 (1.8%)    |
| Lixisenatide  | -                  | -                | 1,692 (0.5%)       | -               | -                   | 2,515 (0.6%)    |
| Semaglutide   | -                  | -                | 47,356 (13.0%)     | -               | -                   | 65,651 (15.0%)  |
| Linagliptin   | -                  | 73,420 (18.85%)  | -                  | 81,774 (22.4%)  | -                   | -               |
| Saxagliptin   | -                  | 29,905 (7.68%)   | -                  | 27,924 (7.7%)   | -                   | -               |
| Alogliptin    | -                  | 6,500 (1.67%)    | -                  | 5,757 (1.6%)    | -                   | -               |
| Sitagliptin   | -                  | 279,629 (71.80%) | -                  | 249,455 (68.4%) | -                   | -               |

DPP-4i = dipeptidyl peptidase-4 inhibitor; GLP-1RA = glucagon-like peptide-1 receptor agonist; SGLT2i = sodium-glucose cotransporter-2 inhibitor.

**Supplemental Table 7.** Follow-up and censoring reasons after 1:1 propensity score matching for (A) SGLT-2i vs. DPP-4i, (B) GLP-1RA vs. DPP-4i and (C) SGLT-2i vs. GLP-1RA.

| <b>A. SGLT-2i vs. DPP-4i</b>                                        | <b>Overall population<br/>N = 778,908</b> | <b>SGLT-2i<br/>N = 389,454</b> | <b>DPP-4i<br/>N = 389,454</b> |
|---------------------------------------------------------------------|-------------------------------------------|--------------------------------|-------------------------------|
| Follow-up, mean (sd), days                                          | 267 (313)                                 | 272 (322)                      | 262 (303)                     |
| Follow-up, median (25 <sup>th</sup> , 75 <sup>th</sup> , IQR), days | 147 (69, 328, 259)                        | 148 (64, 335, 271)             | 145 (74, 321, 247)            |
| Censoring reasons (%)                                               |                                           |                                |                               |
| Treatment discontinuation                                           | 492,802 (63.3)                            | 245,031 (62.9)                 | 247,771 (63.6)                |
| End of study                                                        | 117,308 (15.1)                            | 61,940 (15.9)                  | 55,368 (14.2)                 |
| Treatment switching                                                 | 46,405 (6.0)                              | 20,112 (5.2)                   | 26,293 (6.8)                  |
| Disenrollment                                                       | 105,740 (13.6)                            | 55,382 (14.22)                 | 50,358 (12.9)                 |
| Hyperkalemia outcome                                                | 12,444 (1.6)                              | 5,351 (1.4)                    | 7,093 (1.8)                   |
| Mortality                                                           | 4,209 (0.5)                               | 1,638 (0.4)                    | 2,571 (0.7)                   |
| Number of patients with ≥1 year follow-up on treatment (%)          | 172,463 (22.1)                            | 88,591 (22.7)                  | 83,872 (21.5)                 |
| Number of patients with ≥2 year follow-up on treatment (%)          | 61,556 (7.9)                              | 32,410 (8.3)                   | 29,146 (7.5)                  |

| <b>B. GLP-1RA vs. DPP-4i</b>                                        | <b>Overall population<br/>N = 729,820</b> | <b>GLP-1RA<br/>N = 364,910</b> | <b>DPP-4i<br/>N = 364,910</b> |
|---------------------------------------------------------------------|-------------------------------------------|--------------------------------|-------------------------------|
| Follow-up, mean (sd), days                                          | 252 (299)                                 | 239 (290)                      | 265 (308)                     |
| Follow-up, median (25 <sup>th</sup> , 75 <sup>th</sup> , IQR), days | 134 (58, 306, 248)                        | 146 (74, 326, 252)             | 121 (58, 286, 228)            |
| Censoring reasons (%)                                               |                                           |                                |                               |
| Treatment discontinuation                                           | 480,331 (65.81)                           | 250,998 (68.8)                 | 229,333 (62.9)                |
| End of study                                                        | 109,312 (15.0)                            | 54,258 (14.9)                  | 55,054 (15.1)                 |
| Treatment switching                                                 | 29,942 (4.1)                              | 7,744 (2.1)                    | 22,198 (6.1)                  |
| Disenrollment                                                       | 93,175 (12.8)                             | 45,122 (12.4)                  | 48,053 (13.2)                 |
| Hyperkalemia outcome                                                | 12,845 (1.8)                              | 5,296 (1.5)                    | 7,549 (2.1)                   |
| Mortality                                                           | 4,215 (0.6)                               | 1,492 (0.4)                    | 2,723 (0.8)                   |
| Number of patients with ≥1 year follow-up on treatment (%)          | 149,138 (20.4)                            | 69,227 (19.0)                  | 79,911 (21.9)                 |
| Number of patients with ≥2 year follow-up on treatment (%)          | 51,677 (7.1)                              | 24,177 (6.6)                   | 27,500 (7.5)                  |

| <b>C. SGLT-2i vs. GLP-1RA</b>                                       | <b>Overall population<br/>N = 873,460</b> | <b>SGLT-2i<br/>N = 436,730</b> | <b>GLP-1RA<br/>N = 436,730</b> |
|---------------------------------------------------------------------|-------------------------------------------|--------------------------------|--------------------------------|
| Follow-up, mean (sd), days                                          | 245 (291)                                 | 250 (294)                      | 240 (288)                      |
| Follow-up, median (25 <sup>th</sup> , 75 <sup>th</sup> , IQR), days | 130 (58, 299, 241)                        | 136 (58, 307, 249)             | 125 (58, 291, 233)             |
| Censoring reasons (%)                                               |                                           |                                |                                |
| Treatment discontinuation                                           | 539,318 (61.8)                            | 260,880 (59.7)                 | 278,438 (63.8)                 |
| End of study                                                        | 146,433 (16.8)                            | 75,741 (17.3)                  | 70,692 (16.2)                  |
| Treatment switching                                                 | 61,941 (7.1)                              | 33,635 (7.7)                   | 28,306 (6.5)                   |
| Disenrollment                                                       | 110,003 (12.6)                            | 58,535 (13.4)                  | 51,468 (11.8)                  |
| Hyperkalemia outcome                                                | 12,276 (1.4)                              | 6,107 (1.4)                    | 6,169 (1.4)                    |
| Mortality                                                           | 3,489 (0.4)                               | 1,832 (0.4)                    | 1,657 (0.4)                    |
| Number of patients with ≥1 year follow-up on treatment (%)          | 162,763 (18.6)                            | 83,824 (19.2)                  | 78,939 (18.1)                  |
| Number of patients with ≥2 year follow-up on treatment (%)          | 55,507 (6.4)                              | 28,618 (6.6)                   | 26,889 (6.2)                   |

DPP-4i = dipeptidyl peptidase-4 inhibitor; GLP-1RA = glucagon-like peptide-1 receptor agonist; SD = standard deviation; IQR = interquartile range; SGLT-2i = sodium-glucose cotransporter 2 inhibitor.

**Supplemental Table 8.** Absolute risks and risk differences for the primary outcome at 6-month intervals for SGLT-2i vs. DPP-4i, GLP-1RA vs. DPP-4i and SGLT-2i vs. GLP-1RA after 1:1 propensity score matching.

|           | <b>Absolute risk SGLT-2i,<br/>% (95% CI)</b> | <b>Absolute risk DPP-4i,<br/>% (95% CI)</b> | <b>Absolute risk difference,<br/>% (95% CI)*</b> |
|-----------|----------------------------------------------|---------------------------------------------|--------------------------------------------------|
| 6 months  | 1.1% (1.0% to 1.1%)                          | 1.3% (1.3% to 1.4%)                         | -0.2% (-0.3% to -0.2%)                           |
| 12 months | 1.9% (1.8% to 1.9%)                          | 2.5% (2.4% to 2.5%)                         | -0.6% (-0.7% to -0.5%)                           |
| 18 months | 2.6% (2.5% to 2.7%)                          | 3.6% (3.4% to 3.7%)                         | -1.0% (-1.1% to -0.8%)                           |
| 24 months | 3.3% (3.2% to 3.4%)                          | 4.6% (4.5% to 4.8%)                         | -1.3% (-1.5% to -1.1%)                           |
| 30 months | 4.0% (3.9% to 4.2%)                          | 5.8% (5.6% to 6.0%)                         | -1.8% (-2.1% to -1.6%)                           |
| 36 months | 4.6% (4.4% to 4.7%)                          | 7.0% (6.7% to 7.2%)                         | -2.4% (-2.7% to -2.1%)                           |

\* DPP-4i group taken as reference, i.e., a negative risk difference favors the SGLT-2i group, whereas a positive risk difference favors the DPP-4i group.

|           | <b>Absolute risk GLP-1RA,<br/>% (95% CI)</b> | <b>Absolute risk DPP-4i,<br/>% (95% CI)</b> | <b>Absolute risk difference,<br/>% (95% CI)*</b> |
|-----------|----------------------------------------------|---------------------------------------------|--------------------------------------------------|
| 6 months  | 1.2% (1.1% to 1.2%)                          | 1.5% (1.5% to 1.6%)                         | -0.3% (-0.4% to -0.3%)                           |
| 12 months | 2.2% (2.1% to 2.3%)                          | 2.8% (2.7% to 2.9%)                         | -0.6% (-0.7% to -0.5%)                           |
| 18 months | 3.1% (3.0% to 3.2%)                          | 4.0% (3.9% to 4.1%)                         | -0.9% (-1.1% to -0.7%)                           |
| 24 months | 4.0% (3.9% to 4.2%)                          | 5.2% (5.0% to 5.3%)                         | -1.2% (-1.4% to -0.9%)                           |
| 30 months | 4.9% (4.7% to 5.1%)                          | 6.5% (6.3% to 6.7%)                         | -1.5% (-1.8% to -1.2%)                           |
| 36 months | 5.7% (5.5% to 6.0%)                          | 7.5% (7.2% to 7.8%)                         | -1.8% (-2.1% to -1.4%)                           |

\* DPP-4i group taken as reference, i.e., a negative risk difference favors the GLP-1RA group, whereas a positive risk difference favors the DPP-4i group.

|           | <b>Absolute risk SGLT-2i, % (95%<br/>CI)</b> | <b>Absolute risk GLP-1RA,<br/>% (95% CI)</b> | <b>Absolute risk difference,<br/>% (95% CI)*</b> |
|-----------|----------------------------------------------|----------------------------------------------|--------------------------------------------------|
| 6 months  | 1.1% (1.1% to 1.2%)                          | 1.1% (1.1% to 1.2%)                          | 0.0% (0.0% to 0.1%)                              |
| 12 months | 2.0% (2.0% to 2.1%)                          | 2.1% (2.1% to 2.2%)                          | -0.1% (-0.2% to 0.0%)                            |
| 18 months | 2.8% (2.7% to 2.9%)                          | 3.1% (3.0% to 3.2%)                          | -0.3% (-0.5% to -0.2%)                           |
| 24 months | 3.5% (3.4% to 3.6%)                          | 4.0% (3.9% to 4.2%)                          | -0.6% (-0.7% to -0.4%)                           |
| 30 months | 4.2% (4.0% to 4.4%)                          | 5.1% (4.9% to 5.3%)                          | -0.9% (-1.1% to -0.6%)                           |
| 36 months | 4.7% (4.5% to 4.9%)                          | 6.0% (5.7% to 6.2%)                          | -1.2% (-1.5% to -0.9%)                           |

\* GLP-1RA group taken as reference, i.e., a negative risk difference favors the SGLT-2i group, whereas a positive risk difference favors the GLP-1RA group.

**Supplemental Table 9.** Comparative effectiveness of (A) SGLT-2i versus DPP-4i, (B) GLP-1RA vs. DPP-4i and (C) SGLT-2i vs. GLP-1RA on risk of serum potassium  $\geq 5.5$  mmol/L (secondary outcome) after 1:1 propensity score matching.

| <b>A. SGLT-2i vs. DPP-4i</b>     | <b>SGLT-2i</b>                | <b>DPP-4i</b>          |
|----------------------------------|-------------------------------|------------------------|
| Sample size, n                   | 30,416                        | 30,416                 |
| Total events, n                  | 682                           | 781                    |
| Follow-up, PY                    | 21,390                        | 20,939                 |
| Incidence rate/1,000PY (95% CI)  | 31.88 (29.54 to 34.37)        | 37.30 (34.73 to 40.01) |
| Rate difference/1,000PY (95% CI) | <b>-5.41 (-8.96 to -1.87)</b> | Ref                    |
| HR (95% CI)                      | <b>0.86 (0.78 to 0.95)</b>    | Ref                    |

| <b>B. GLP-1RA vs. DPP-4i</b>     | <b>GLP-1RA</b>                 | <b>DPP-4i</b>          |
|----------------------------------|--------------------------------|------------------------|
| Sample size, n                   | 28,184                         | 28,184                 |
| Total events, n                  | 527                            | 709                    |
| Follow-up, PY                    | 17,899                         | 19,649                 |
| Incidence rate/1,000PY (95% CI)  | 29.44 (26.98 to 32.07)         | 36.08 (33.48 to 38.84) |
| Rate difference/1,000PY (95% CI) | <b>-6.64 (-10.30 to -2.98)</b> | Ref                    |
| HR (95% CI)                      | <b>0.82 (0.73 to 0.91)</b>     | Ref                    |

| <b>C. SGLT-2i vs. GLP-1RA</b>    | <b>SGLT-2i</b>              | <b>GLP-1RA</b>         |
|----------------------------------|-----------------------------|------------------------|
| Sample size, n                   | 36,065                      | 36,065                 |
| Total events, n                  | 700                         | 639                    |
| Follow-up, PY                    | 23,544                      | 21,814                 |
| Incidence rate/1,000PY (95% CI)  | 29.73 (27.57 to 32.02)      | 29.29 (27.07 to 31.66) |
| Rate difference/1,000PY (95% CI) | <b>0.44 (-2.73 to 3.60)</b> | Ref                    |
| HR (95% CI)                      | <b>1.01 (0.91 to 1.12)</b>  | Ref                    |

CI = confidence interval; DPP-4i = dipeptidyl peptidase-4 inhibitor; GLP-1RA = glucagon-like peptide-1 receptor agonist; HR = hazard ratio; PY = person-years; Ref = reference; SGLT-2i = sodium-glucose cotransporter-2 inhibitor.



**Supplemental Table 10.** Comparative effectiveness of (A) SGLT-2i versus DPP-4i, (B) GLP-1RA vs. DPP-4i and (C) SGLT-2i vs. GLP-1RA on risk of hyperkalemia diagnosis in inpatient or emergency department setting (secondary outcome) after 1:1 propensity score matching.

| <b>A. SGLT-2i vs. DPP-4i</b>     | <b>SGLT-2i</b>                | <b>DPP-4i</b>       |
|----------------------------------|-------------------------------|---------------------|
| Sample size, n                   | 389,454                       | 389,454             |
| Total events, n                  | 657                           | 844                 |
| Follow-up, PY                    | 293,154                       | 284,671             |
| Incidence rate/1,000PY (95% CI)  | 2.24 (2.07 to 2.42)           | 2.96 (2.77 to 3.17) |
| Rate difference/1,000PY (95% CI) | <b>-0.72 (-0.99 to -0.46)</b> | Ref                 |
| HR (95% CI)                      | <b>0.77 (0.69 to 0.85)</b>    | Ref                 |

| <b>B. GLP-1RA vs. DPP-4i</b>     | <b>GLP-1RA</b>                | <b>DPP-4i</b>       |
|----------------------------------|-------------------------------|---------------------|
| Sample size, n                   | 364,910                       | 364,910             |
| Total events, n                  | 638                           | 1,106               |
| Follow-up, PY                    | 242,282                       | 269,539             |
| Incidence rate/1,000PY (95% CI)  | 2.63 (2.43 to 2.85)           | 4.10 (3.87 to 4.35) |
| Rate difference/1,000PY (95% CI) | <b>-1.47 (-1.79 to -1.15)</b> | Ref                 |
| HR (95% CI)                      | <b>0.65 (0.59 to 0.72)</b>    | Ref                 |

| <b>C. SGLT-2i vs. GLP-1RA</b>    | <b>SGLT-2i</b>               | <b>GLP-1RA</b>      |
|----------------------------------|------------------------------|---------------------|
| Sample size, n                   | 436,730                      | 436,730             |
| Total events, n                  | 741                          | 705                 |
| Follow-up, PY                    | 312,063                      | 282,902             |
| Incidence rate/1,000PY (95% CI)  | 2.37 (2.21 to 2.55)          | 2.49 (2.31 to 2.68) |
| Rate difference/1,000PY (95% CI) | <b>-0.12 (-0.37 to 0.13)</b> | Ref                 |
| HR (95% CI)                      | <b>0.96 (0.86 to 1.06)</b>   | Ref                 |

CI = confidence interval; DPP-4i = dipeptidyl peptidase-4 inhibitor; GLP-1RA = glucagon-like peptide-1 receptor agonist; HR = hazard ratio; PY = person-years; Ref = reference; SGLT-2i = sodium-glucose cotransporter-2 inhibitor.

**Supplemental Table 11.** Sensitivity analyses: Incidence rate differences and hazard ratios for (A) SGLT-2i vs. DPP-4i, (B) GLP-1RA vs. DPP-4i and (C) SGLT-2i vs. GLP-1RA after 1:1 propensity score matching.

| <b>A. SGLT-2i vs. DPP-4i</b>                   | <b>Main analysis</b>   | <b>60-day grace period</b> | <b>180-day ITT follow-up</b> | <b>365-day ITT follow-up</b> | <b>No history of hyperkalemia or potassium binder use in previous 365 days*</b> |
|------------------------------------------------|------------------------|----------------------------|------------------------------|------------------------------|---------------------------------------------------------------------------------|
| Incidence rate difference/<br>1,000PY (95% CI) | -6.88 (-7.65 to -6.11) | -7.40 (-8.08 to -6.72)     | -4.04 (-5.07 to -3.00)       | -5.00 (-5.77 to -4.23)       | -6.08 (-6.82 to -5.34)                                                          |
| Hazard ratio (95% CI)                          | 0.75 (0.73 to 0.78)    | 0.73 (0.71 to 0.75)        | 0.85 (0.81 to 0.88)          | 0.82 (0.79 to 0.84)          | 0.76 (0.73 to 0.79)                                                             |

| <b>B. GLP-1RA vs. DPP-4i</b>                   | <b>Main analysis</b>   | <b>60-day grace period</b> | <b>180-day ITT follow-up</b> | <b>365-day ITT follow-up</b> | <b>No history of hyperkalemia or potassium binder use in previous 365 days*</b> |
|------------------------------------------------|------------------------|----------------------------|------------------------------|------------------------------|---------------------------------------------------------------------------------|
| Incidence rate difference/<br>1,000PY (95% CI) | -6.36 (-7.24 to -5.48) | -6.26 (-7.02 to -5.49)     | -4.58 (-5.72 to -3.44)       | -3.64 (-4.44 to -2.84)       | -5.44 (-6.27 to -4.61)                                                          |
| Hazard ratio (95% CI)                          | 0.79 (0.77 to 0.82)    | 0.79 (0.76 to 0.82)        | 0.85 (0.82 to 0.89)          | 0.87 (0.84 to 0.90)          | 0.80 (0.77 to 0.83)                                                             |

| <b>C. SGLT-2i vs. GLP-1RA</b>                  | <b>Main analysis</b>   | <b>60-day grace period</b> | <b>180-day ITT follow-up</b> | <b>365-day ITT follow-up</b> | <b>No history of hyperkalemia or potassium binder use in previous 365 days*</b> |
|------------------------------------------------|------------------------|----------------------------|------------------------------|------------------------------|---------------------------------------------------------------------------------|
| Incidence rate difference/<br>1,000PY (95% CI) | -2.31 (-3.05 to -1.57) | -2.84 (-3.49 to -2.19)     | -0.09 (-1.06 to 0.88)        | -1.75 (-2.45 to -1.04)       | -2.11 (-2.81 to -1.41)                                                          |
| Hazard ratio (95% CI)                          | 0.92 (0.89 to 0.95)    | 0.89 (0.86 to 0.91)        | 1.00 (0.96 to 1.04)          | 0.92 (0.89 to 0.96)          | 0.91 (0.88 to 0.94)                                                             |

CI = confidence interval; DPP-4i = dipeptidyl peptidase-4 inhibitor; GLP-1RA = glucagon-like peptide-1 receptor agonist; ITT = intention-to-treat; PY = person-years; SGLT-2i = sodium-glucose cotransporter 2 inhibitor.

\* Outcome for this sensitivity analysis was “hyperkalemia diagnosis in inpatient or outpatient setting or initiation of potassium binder during follow-up”.

Supplemental Figure 1. Overview of study design.

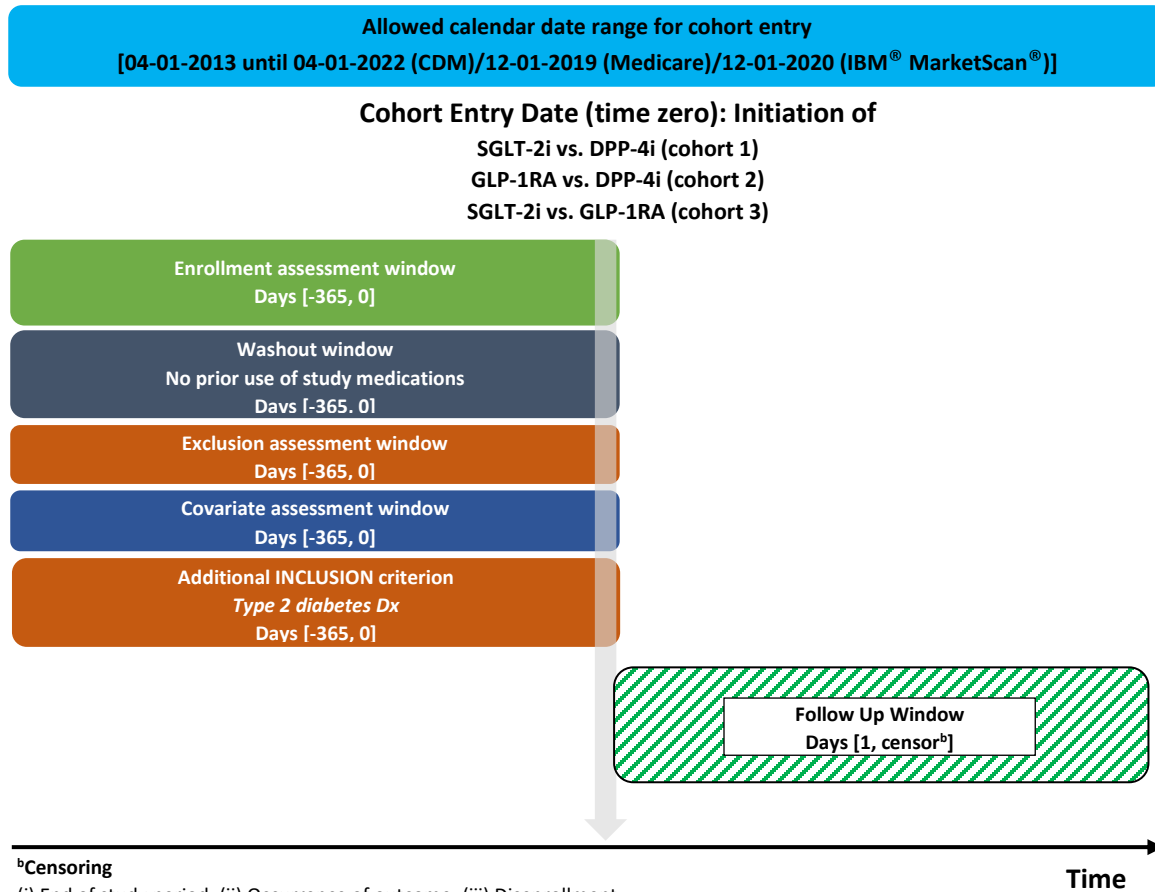

CDM = Optum's de-identified Clinformatics® Data Mart Database; DPP-4i = dipeptidyl peptidase-4 inhibitor; GLP-1RA = glucagon-like peptide-1 receptor agonist; ITT = intention-to-treat; SGLT-2i = sodium-glucose cotransporter 2 inhibitor.
